1 **IFN-independent G0 arrest and SAMHD1 activation following TLR4 activation in**  
2 **macrophages**

3

4 Mlcochova P.<sup>1,2\*</sup>, Winstone H.<sup>2</sup>, Zuliani-Alvarez L.<sup>2</sup>, Gupta R.K.<sup>1,2,3</sup>

5

6 <sup>1</sup>Department of Medicine, University of Cambridge, Cambridge, UK.

7 <sup>2</sup>Division of Infection and Immunity, UCL, London, UK.

8 <sup>3</sup>Africa Health Research Institute, KwaZulu Natal, South Africa

9

10 \*Correspondence to: Petra Mlcochova, pm685@cam.ac.uk

11 Jeffrey Cheah Biomedical Centre

12 Puddicombe Way,

13 Cambridge

14 CB20AF

15

16 Key words: TLR4, G0 arrest, human macrophages, SAMHD1, HIV

17

18

19 **Abstract**

20 Monocyte-derived macrophages mostly reside in a resting, G0 state, expressing high levels of  
21 dephosphorylated, active SAMHD1. We have previously shown that macrophages can re-  
22 enter the cell cycle without division, into a G1-like state. This cell cycle re-entry is  
23 accompanied by phosphorylation of the dNTP hydrolase/ antiviral restriction factor  
24 SAMHD1 at T592 by the cyclin-dependent kinase CDK1. HIV-1 successfully infects  
25 macrophages in G1 through exploiting this naturally occurring window of opportunity where  
26 SAMHD1 antiviral activity is de-activated.

27

28 Here we demonstrate for the first time that LPS activation of the pathogen associated  
29 molecular pattern (PAMP) receptor TLR4 induces G0 arrest in human macrophages. We  
30 show this G0 arrest is MyD88-independent and therefore NFkB independent. Furthermore,  
31 the effect of TLR4 activation on cell cycle is regulated by (a) the canonical IFN-dependent  
32 pathway following TBK1 activation and IRF3 translocation and (b) an IFN-independent  
33 pathway that occurs prior to TBK1 activation, and that is accompanied by CDK1  
34 downregulation, p21 upregulation and SAMHD1 dephosphorylation at T592. Furthermore,  
35 we show by siRNA knockdown of SAMHD1 that the interferon independent pathway  
36 activated by TLR4 is able to potently block HIV-1 infection in macrophages specifically via  
37 SAMHD1. Finally, ingestion of whole E. Coli and TLR4 activation by macrophages also  
38 activates SAMHD1 via the interferon independent pathway.

39 Together, these data demonstrate that macrophages can rapidly activate an intrinsic cell arrest  
40 and anti-viral state by activation of TLR4 prior to IFN secretion, thereby highlighting the  
41 importance of cell cycle regulation as a response to danger signals in human macrophages.  
42 Interferon independent activation of SAMHD1 by TLR4 represents a novel mechanism for

43 limiting the HIV-1 reservoir size and should be considered for host-directed therapeutic

44 approaches that may contribute to curative interventions.

45

## 46 **Introduction**

47 Macrophages are the first line of defence against invading pathogens, sensing through  
48 pathogen recognition receptors (PRRs) and initiating innate and adaptive responses. The most  
49 studied PRRs are Toll-like receptors (TLRs), expressed in monocytes, macrophages and  
50 dendritic cells. They play a fundamental role in recognition of pathogen-associated molecular  
51 patterns expressed on infectious agents, and subsequently initiate a series of inflammatory  
52 events that depend upon the MyD88 and/or TRIF signalling pathways <sup>1</sup>. Amongst TLRs,  
53 TLR4 acts as a receptor for lipopolysaccharide (LPS), a component from the wall of gram-  
54 negative bacteria <sup>2</sup>. Once activated it triggers a well characterised downstream-signalling  
55 cascade involving multiple signalling components, culminating in the activation of  
56 transcription factors, such as NFkB and IRFs, which, in turn induce various immune and pro-  
57 inflammatory genes <sup>3</sup>.

58

59 Many studies in the past have shown that LPS has a potent inhibitory activity against HIV-1  
60 infection <sup>4-10</sup>. LPS has been shown to down-regulate receptors for HIV-1 entry and impair  
61 early steps of viral life cycle <sup>5,11,12</sup>. The mediators of HIV-1 suppression by LPS-stimulated  
62 MDM are mostly secreted  $\beta$ -chemokines and interferons (IFN) <sup>4,7,9,11</sup>. However, some data  
63 suggest that IFN release by LPS-stimulated macrophages/dendritic cells might not be the  
64 main mediator of HIV-1 suppression <sup>9,10</sup>. The diverse data on effect of LPS in HIV-1  
65 infection suggests multiple anti-HIV mechanisms, consistent with up-regulation of an array  
66 of HIV-1 restriction factors <sup>7,10,13</sup> by IFN in LPS-stimulated macrophages and dendritic cells.

67

68 Terminally differentiated myeloid cells and resting T cells express SAMHD1, a  
69 deoxynucleotide-triphosphate (dNTP) hydrolase which restricts HIV-1 reverse transcription  
70 (RT) through decreasing levels of dNTPs <sup>14,15</sup>. SAMHD1 phosphorylation at position T592

71 mediated by cyclin-dependent kinases CDK1/2<sup>16,17</sup> impairs its dNTP hydrolase activity in  
72 actively dividing cells and allows viral DNA synthesis to occur<sup>16,18</sup>. SAMHD1 in its  
73 dephosphorylated form is active against HIV-1 and known to block infection<sup>16,17,19,20</sup>.

74

75 Our group recently showed that SAMHD1 restriction capacity can be manipulated in  
76 monocyte-derived macrophages (MDM). We demonstrated that macrophages, cells normally  
77 residing in a G0/terminally differentiated state can re-enter the cell cycle into a G1-like  
78 phase, expressing certain cellular cell cycle factors, including CDK1 that is known to  
79 phosphorylate and deactivate the antiviral activity of SAMHD1<sup>19,21</sup>.

80

81 Type-I interferons are known to lead to dephosphorylation/activation of SAMHD1 in MDM  
82<sup>16,22</sup>. Whilst it has been proposed that LPS-stimulated macrophages can mediate HIV-1  
83 restriction through IFN secretion, the role of SAMHD1 has not been established.

84

85 Here we show that TLR4 activation by bacterial LPS can mediate HIV-1 inhibition through  
86 regulation of SAMHD1 in an IFN-independent manner, as well as via the canonical IFN  
87 dependent pathway. We show that this IFN-independent pathway is MyD88-independent,  
88 occurring prior to TBK1 activation, and resulting in p21 upregulation and G0 arrest with  
89 SAMHD1 dephosphorylation. This is the first demonstration that TLR4 activation can  
90 directly induce G0 arrest in human macrophages, adding to growing evidence that G0 arrest  
91 is a conserved and important response to danger signals even in cells classically viewed as  
92 being terminally differentiated.

93

94

95 **Results**

96 **Interferon-independent SAMHD1 dephosphorylation and HIV-1 blockade in**  
97 **macrophages following TLR4 activation**

98 We used human monocyte derived macrophages (MDM) to study the effect of LPS on  
99 permissivity to HIV-1 infection. Macrophages were exposed to 10ng/ml LPS for 18h and  
100 infected with VSV-G pseudotyped HIV-1 expressing GFP. LPS treatment completely  
101 inhibited HIV-1 infection of MDM, accompanied by activation/dephosphorylation of  
102 SAMHD1 at T592 (Fig.1A,B).

103 We next confirmed that the LPS effect on HIV-1 infection was directly through TLR4  
104 activation (Fig.1C). We used the TLR4 inhibitor TAK242 that in the presence of LPS was  
105 able to rescue HIV-1 infection of MDM and prevent SAMHD1 activation/dephosphorylation  
106 (Fig.1D). TAK242 also prevented translocation of NFkB and IRF3 into nucleus in the  
107 presence of LPS, confirming TLR4 inhibition (Fig. 1C,E).

108 TLR4 activation stimulates production of interferons (IFN). In order to understand if IFN  
109 plays role in SAMHD1 activation/dephosphorylation after TLR4 activation as recently  
110 published<sup>16,22</sup>, we used the JAK1/2 inhibitor Ruxolitinib (RUXO) that inhibits IFN signalling  
111 (Fig.1C)<sup>23</sup>. The inhibitor of IFN signalling could not restore infection and failed to reverse  
112 SAMHD1 phosphorylation at T592, suggesting that regulation of SAMHD1 phosphorylation  
113 is largely independent of IFN (Fig.1F). Importantly, RUXO had no effect on nuclear  
114 IRF3/NFkB translocation following LPS addition (Fig.1G).

115 Next, we used the TBK1 inhibitor BX795 (Fig.1C,H,I) that blocks the phosphorylation,  
116 nuclear translocation, and transcriptional activity of IRF3 and production of interferon in  
117 response to TLR3 and TLR4 agonists<sup>24</sup> (Fig.1I). BX795 treatment also failed to restore  
118 infection and SAMHD1 phosphorylation after LPS addition (Fig.1H), confirming that  
119 SAMHD1 dephosphorylation/activation is IFN-independent and is mediated upstream from  
120 TBK1.

121

122 **SAMHD1 activation following TLR4 engagement is MyD88 independent**

123 Tenascin-C (TNC) is an extracellular matrix protein which expression is rapidly induced at  
124 the site of infection or injury where it triggers inflammation by activating TLR4 in different  
125 cells including macrophages<sup>25</sup>. This TLR4 activation is specifically mediated through the  
126 MyD88-dependent pathway<sup>26</sup> (Fig. 2A). TNC effectively activated the MyD88 dependent  
127 pathway in MDM, which was confirmed by detectable translocation of NFkB but absence of  
128 nuclear IRF3 (Fig. 2B) and by production of cytokines into culture media after treatment with  
129 LPS and TNC (Fig.2C). Importantly, when MDM were treated with TNC, no SAMHD1  
130 dephosphorylation or HIV-1 inhibition was detected (Fig. 2D). From these experiments we  
131 conclude that LPS activates TLR4 and blocks HIV-1 infection in a MyD88-independent  
132 pathway, culminating in dephosphorylation of SAMHD1.

133

134 **TLR4 engagement results in interferon-independent G0 arrest in macrophages**

135 We have shown previously that macrophage entry to a G1-like state is accompanied by an  
136 increase in certain cell cycle associated proteins such as MCM2 and CDK1, as well as  
137 phosphorylation of SAMHD1 at T592 that confers increased susceptibility to HIV-1 infection  
138<sup>19,21</sup>. LPS treatment resulted in a decrease of MCM2 expression and as expected, SAMHD1  
139 dephosphorylation at T592 (Fig.3A, S1A,B). These results suggest that LPS treatment led to  
140 cell arrest in macrophages where SAMHD1 is activated and can block HIV-1 infection as  
141 shown in Fig.3A,B. Crucially, the TLR4 inhibitor TAK242 completely reversed the cell  
142 arrest and SAMHD1 phosphorylation changes, restoring HIV-1 infection. As expected,  
143 blocking IFN signalling in macrophages by treatment with RUXO or TBK1 inhibitor BX795  
144 could not restore cell cycle changes, SAMHD1 phosphorylation and HIV-1 infection  
145 (Fig.3A,B). Remarkably, addition of TNC, molecule that activates TLR4 exclusively via the

146 MyD88-dependent signalling pathway, had no effect on cell cycle in MDM (Fig.3C). These  
147 data strongly suggest that HIV-1 restriction is mediated through G0 arrest that is uncoupled  
148 from IRF3 signalling.

149 We hypothesised that the LPS induced G0 arrest would be regulated by expression of  
150 negative cell cycle regulators such as p21 or p27. Indeed, immunoblotting confirmed that the  
151 decrease in CDK1 and MCM2 after LPS treatment was accompanied by increased p21 levels  
152 (Fig.3D). As we were unable to detect p27 expression in immunoblot we next sought to  
153 further characterise the cell cycle program changes triggered by LPS in MDM, using a panel  
154 of cell cycle associated transcripts (Fig.3E,F). Statistically significant decreases were  
155 observed in transcripts associated with cell cycle progression: CDK1, cyclin E2, cyclin B1,  
156 E2F1, MCM2 transcripts compared to the untreated control (set to 1). A small but significant  
157 increase was observed for SAMHD1 and WIF1 transcripts, and also for transcripts associated  
158 with G0 arrest or G0 state: CDK2, RB1, p27 and p21. These data show that the macrophage  
159 cell cycle program is impacted by TLR4 engagement, and are the first evidence of G0 arrest  
160 induced by LPS treatment in primary human macrophages.

161

### 162 **Type-I Interferon impacts cell cycle in human macrophages**

163 TLR4 activation of a TRIF dependent pathway leads to IRF3 translocation into the nucleus  
164 and expression of interferon (IFN). IFN as a cause of G0 arrest has been reported in myeloid  
165 cells from mice and murine cell lines as well as in human cell lines<sup>27-29</sup>, monocytes and T-  
166 cells<sup>30</sup>. The effect of IFN on cell cycle states in primary human macrophages has not been  
167 reported.

168 We therefore examined the effect of blocking IFN signalling after TLR4 activation as well as  
169 after addition of exogenous IFN $\beta$  (Fig.4). Ruxolitinib (RUXO), an inhibitor of JAK kinases  
170 and IFN signalling, was used to treat MDM 6h before addition of LPS or IFN $\beta$ . As expected



171 RUXO completely blocked expression of selected ISG: CXCL10, MxA, ISG 54 and 56 after  
172 both LPS and IFN $\beta$  treatment, confirming that IFN signalling is inhibited in both conditions  
173 (Fig.4A).

174 While G0 arrest was observed after both LPS and exogenous IFN $\beta$  addition, based on  
175 expression levels of cell cycle associated transcripts, RUXO was unable to rescue G0 arrest  
176 caused by LPS/TLR4 activation but completely rescued G0 arrest after addition of exogenous  
177 IFN $\beta$  (Fig.4A,B). This confirms redundancy of pathways activated by TLR4 that lead to G0  
178 arrest. In concordance with these results RUXO failed to restore HIV-1 infection from the  
179 effect of LPS but completely rescued HIV-1 infection after exposure to exogenous IFN $\beta$   
180 (Fig.4C). These data were confirmed by using an IFN receptor antibody instead of RUXO  
181 (Fig.4D). As a control the TLR4 inhibitor TAK242 rescued cell cycle and HIV-1 infection  
182 after LPS treatment. As expected, TAK242 could not rescue either after IFN $\beta$  treatment.

183 We conclude existence of two independent pathways that are responsible for G0 arrest in  
184 MDM, both of which are able to potently block HIV-1 infection. G0 arrest being the first  
185 early block to HIV-1 infection while IFN production representing a second wave.

186

187 **SAMHD1 is directly responsible for the interferon independent HIV-1 blockade**  
188 **following TLR4 activation**

189 We have shown previously that the restriction of HIV-1 infection in G0 MDM can be  
190 completely lifted by SAMHD1 depletion<sup>19</sup>. Our experimental system here involves use of  
191 MDM predominantly in G1, where SAMHD1 is deactivated/phosphorylated. To confirm that  
192 SAMHD1 dephosphorylation/activation is responsible for block to HIV-1 infection after  
193 TLR4 activation we employed SAMHD1 knock-down (KD) (Fig.5).

194 We knocked-down SAMHD1 expression in human MDM using siRNA and infected MDM  
195 in the presence or absence of LPS in four different donors (Fig.5A). SAMHD1 KD lifted

196 HIV-1 block in the presence of LPS, though as predicted from data in figure 1, full rescue of  
197 infection required addition of RUXO (Fig.5B). Immunoblot confirmed 80% SAMHD1 KD  
198 with no effect on the cell cycle marker MCM2 (Fig.5C). We conclude that SAMHD1 plays a  
199 key role in the TLR4 mediated antiretroviral state in human macrophages.

200

### 201 **Gram-negative bacteria induce TLR4 activation and G0 arrest in human MDM**

202 The pHrodo™ *E. coli* BioParticles™ are inactivated, unopsonized *E. coli* (K-12 strain)  
203 (pHrodo) which function as sensitive, fluorogenic particles for the detection of phagocytic  
204 ingestion. We incubated pHrodo with MDM in the presence or absence of different inhibitors  
205 for 1h at 37°C (Fig.6A). Unbound pHrodo was washed of and cell incubated overnight when  
206 cell supernatants were collected for cytokine detection (Fig.6B) and MDM were infected with  
207 HIV-1. Firstly, phagocytosis of pHrodo was unaffected by presence of TLR4, JAK1/2 or  
208 TBK1 inhibitors (Fig.6A). Secondly, binding/ingestion of pHrodo triggered expression of  
209 TNF $\alpha$ , IL-6 and IL-8 that was abrogated after TLR4 inhibition but not by inhibition of the  
210 IFN signalling pathway (Fig.6B). This was confirmed by a IRF3, NF $\kappa$ B translocation assay  
211 (Fig.6C). These data clearly show that pHrodo triggers strong immune response in MDM that  
212 can be prevented by TLR4 inhibition. Treatment of MDM with pHrodo induced potent HIV-  
213 1 inhibition that was accompanied by G0 arrest and SAMHD1 activation/dephosphorylation  
214 at T592 (Fig.6D,E)

215 Importantly, TLR4 blockade was able to rescue cell cycle changes/SAMHD1  
216 phosphorylation and HIV-1 infection but neither RUXO or TBK1 inhibitor BX795 could  
217 restore infection and cell cycle changes, phenocopying experiments with LPS alone (Fig.2).  
218 However, when we measured cell cycle associated transcripts (Fig.6F) there were several  
219 significant differences between LPS and *E. coli* mediated TLR4 activation. Firstly, p16 was  
220 significantly increased and cycA2 decreased. Both these transcripts were unchanged after

221 IFN signalling inhibition suggesting they are IFN-independent changes (Fig.6F, compare to  
222 Fig.3 and 4). These data are the first evidence of G0 arrest in human macrophages after gram-  
223 negative bacterial exposure. This G0 arrest is IFN independent and generates an anti-viral  
224 environment.

225

226

227

228

229 **Discussion**

230

231 Here we have reported three key novel observations. Firstly, G0 arrest occurs in primary  
232 human macrophages after exposure to pathogen via TLR4. Secondly, it is MyD88 and thus  
233 an NFkB independent phenomenon. Thirdly, G0 arrest is mediated through two independent  
234 pathways, one of which is IFN-dependent and the other IFN-independent.

235

236 Our previous work had shown that human monocyte derived macrophages (MDM) can re-  
237 enter cell cycle from their G0 state<sup>19,21</sup>. Once the cells enter cell cycle they are permissive to  
238 HIV-1 infection. We took advantage of this experimental model to investigate whether the  
239 cell cycle is involved in HIV-1 restriction after TLR4 activation. Indeed, TLR4 activation  
240 caused G0 arrest that correlated with SAMHD1 activation and HIV-1 restriction in  
241 macrophages. Moreover, this arrest and subsequent blockade to HIV-1 infection cannot be  
242 simply overcome by blocking IFN signalling. Demonstrating that IFN is not the major driver,  
243 but one of two independent mediators of HIV-1 restriction after TLR4 activation is an  
244 important finding.

245

246 The effect of LPS on G0 arrest has been shown in mouse primary cells and murine cell lines  
247<sup>31,32</sup> or in the human cell line, THP-1/U937<sup>33,34</sup>. Despite these reports, surprisingly little is  
248 known about the mechanism how LPS causes G0 arrest. It has been suggested that production  
249 of ROS or DNA damage can play role<sup>34,35</sup>. Our data suggest that neither ROS nor DNA  
250 damage seems to be responsible for G0 arrest in human MDM (Fig.S2, S3).

251

252 We speculate that mitogen activated protein kinase kinases may play role in the mechanism.

253 We have shown previously that cell cycle re-entry from G0 to G1 state is mediated by

254 MEK/ERK kinases. These kinases can be activated by TLR4 activation in a MyD88-

255 dependent and independent manner<sup>36,37</sup>. Even though it might seem to be counter intuitive as  
256 our previous observations show that activation of MEK/ERK leads to cell cycle re-entry not  
257 to G0 arrest in MDM<sup>19</sup>, it has been suggested that prolonged exposure to LPS can  
258 downregulate phosphorylation (activation) of these kinases<sup>38</sup>, possibly leading thus to G0  
259 transition. Another possibility is that strong TLR4 activation triggers an apoptotic program in  
260 the cells and G0 arrest is first step to apoptosis and cell death<sup>39</sup>. However, we do not see  
261 extensive reduction in cell numbers even 5 days post-LPS treatment (Fig.S3D), suggesting  
262 survival of activated macrophages.

263

264 As with the use of LPS, the majority of studies investigating the effect of IFN on G0 arrest  
265 have been performed in murine cells and transformed cell lines<sup>27-29</sup>. Very little is known  
266 about IFN regulation of cell cycle in non-malignant cells. We show here that human primary  
267 macrophages exit the cell cycle after exposure to exogenous IFN $\beta$  and that this effect is  
268 dependent on JAK/STAT signalling. It has been shown that SAMHD1 can be  
269 activated/dephosphorylated by type I,II and III IFN<sup>16,22</sup> in macrophages. We confirmed this  
270 observation and showed that SAMHD1 phosphorylation and HIV-1 infection can be rescued  
271 when JAK/STAT signalling is blocked after addition of exogenous IFN $\beta$ . Nevertheless, after  
272 activation of the TLR4 receptor, SAMHD1 remains active/dephosphorylated even in the  
273 presence of IFN/JAK/STAT signalling inhibitor, highlighting the role of two independent  
274 pathways regulating HIV-1 restriction in LPS activated macrophages.

275

276 The interferon-independent pathway is accompanied by p21 upregulation and SAMHD1  
277 dephosphorylation. SAMHD1 knockdown (KD) substantially relieved the block to HIV-1  
278 infection after LPS addition. However, only a combination of SAMHD1 KD and inhibition of  
279 IFN signalling could achieve complete rescue of HIV-1 infection after TLR4 activation. This

280 is not surprising as many IFN-inducible proteins with HIV-1 restriction potency have been  
281 shown<sup>40</sup> and may play additional roles in this restriction. These data confirm that SAMHD1  
282 is major player in LPS mediated HIV-1 restriction.

283

284 Importantly we have also shown that E. coli leads to G0 arrest in human macrophages and  
285 this arrest cannot be rescued by blocking IFN signalling. Remarkably however, inhibition of  
286 TLR4 was able to prevent the G0 arrest and SAMHD1 phosphorylation. This suggests that  
287 whole gram-negative bacteria also activate two independent pathways to induce G0 arrest.

288

289 Why would macrophages regulate their cell cycle? Macrophages contribute to innate  
290 immunity via phagocytosis, antigen presentation but they are also secretory cells vital to the  
291 regulation of immune responses and development of inflammation. One can imagine that cell  
292 division of macrophages would benefit the host by increasing the number of effector cells at  
293 the centre of infection. But at the same time the division of infected cells harbouring live  
294 pathogen could also lead to doubling of infected cells, an event that can potentially harm the  
295 host. Even though our previous work showed that MDM re-enter cell cycle without  
296 measurable cell division<sup>19</sup>, many tissue resident macrophages can proliferate<sup>41</sup> and thus  
297 could use G0 arrest as a response to danger signal to stop division and contain infection.

298

299 It is also possible that cell cycle changes are necessary for activation of non-cycling function  
300 of cell cycle associated proteins. G0 or G0 arrested cells will increase expression of e.g. p14,  
301 p16, p21 or p27 proteins. It has been shown that cell cycle regulators can serve non-cycling  
302 functions in innate immunity. It has been suggested that CDK activity is required for IFN- $\beta$   
303 production<sup>42</sup>, which in turn initiates immune system activation. Nevertheless, these  
304 experiments still await validation by specific CDK knockdowns. It has been shown that p21

305 suppress IL-1b<sup>43</sup>, or that p16 inhibits macrophage activity by degradation of interleukin-1  
306 receptor and thus impairs IL-6 production that can lead to tissue inflammation reduction<sup>44</sup>.  
307 Moreover, p27 seems to have a unique role in macrophage migration<sup>45</sup>. It is thus conceivable  
308 that cell cycle regulators can contribute to maintenance of balanced responses to immune  
309 stimuli.

310 The concept that immune system can be manipulated by the host cell cycle has therapeutic  
311 implications and establishes a new paradigm for understanding not only basic cell biology but  
312 may present new ways to treat infectious disease but possibly also autoimmune diseases and  
313 cancer.

314

315 The relevance of macrophage G0 arrest by LPS may be relevant in HIV pathogenesis  
316 where macrophages may be exposed to gut derived LPS during inflammation in the acute or  
317 chronic phase of HIV. These macrophages are likely arrested with SAMHD1  
318 dephosphorylated at T592, and thereby rendered resistant to HIV-1. T cells would remain  
319 more susceptible as they do not express TLR4 and are less sensitive to IFN, consistent with  
320 observed high levels of viral turnover in GALT associated CD4 T cells.

321

322 In summary, our data show that TLR4 activation regulates the cell cycle in human primary  
323 macrophages after exposure to immune stimuli or pathogen. We also show evidence that  
324 TLR4 activation by bacterial LPS can mediate HIV-1 inhibition through regulation of  
325 SAMHD1 phosphorylation in a MyD88-independent manner by two pathways: (i) IFN  
326 dependent pathway and (ii) IFN-independent pathway accompanied by p21 upregulation and  
327 SAMHD1 dephosphorylation. Together, these data suggest that macrophages can rapidly  
328 achieve an anti-viral state by activation of TLR4 and G0 arrest prior to IFN secretion, thereby  
329 demonstrating redundancy and highlighting the importance of cell cycle regulation as a  
330 response to danger signals. Finally, interferon independent activation of SAMHD1 by TLR4

331 represents a novel mechanism for limiting the HIV-1 reservoir size and should be considered

332 for host-directed therapeutic approaches that may contribute to curative interventions.

333

334



335 **Methods**

336

337 **Reagents, inhibitors, antibodies, plasmids**

338 Tissue culture media and supplements were obtained from Invitrogen (Paisley, UK), and  
339 tissue culture plastic was purchased from TPP (Trasadingen, Switzerland). FCS (FBS) was  
340 purchased from Biosera (Boussens, France) and Sigma (Sigma, St. Louis, USA). Human  
341 serum from human male AB plasma was of USA origin and sterile-filtered (Sigma). All  
342 chemicals, were purchased from Sigma (St. Louis, MO, USA) unless indicated otherwise.  
343 LPS (Insight Biotechnology, UK), Interferon-beta (PeproTech, UK), CellRox (Invitrogen,  
344 UK), Tenascin-C (Bio-Techne, Minneapolis, MN, USA), E.coli pHrodo Bioparticles  
345 (ThermoFisher scientific, UK). Ruxolitinib (Cambridge Bioscience, UK), BX795  
346 (Generon,UK), TAK242 (Millipore, UK), 1400W (2B Scientific, UK). Antibodies used were:  
347 anti-cdc2 (Cell Signaling Technology, Beverly, USA); anti-SAMHD1 (ab67820, Abcam,  
348 UK), beta-actin (ab6276, abcam, UK); mouse anti-MCM2 (BM-28, BD Biosciences, UK);  
349 pSAMHD1 ProSci (Poway, CA, USA); p21(sc-6246, Santa Cruz Biotechnology); IRF3  
350 (11904P, Cell Signaling Technology); NFkB p65 (F-6, Insight Biotechnology, UK), gH2AX  
351 (613402, BioLegend); 53BP1 (612522, BD Biosciences, UK), Anti-IFN $\alpha/\beta$  Receptor (PBL  
352 Interferon Source), IgG2A antibody (R&D systems, Minneapolis, MN, USA). Anti-TNF $\alpha$ ,  
353 anti-IL6, anti-IL8, anti-CXCL10 were purchased from BD Biosciences, UK.

354

355 **Cell lines and viruses**

356 293T cells were cultured in DMEM complete (DMEM supplemented with 100 U/ml  
357 penicillin, 0.1 mg/ml streptomycin, and 10% FCS). VSV-G HIV-1 GFP virus was produced  
358 by transfection of 293T with GFP-encoding genome CSGW, packaging plasmid p8.91 and  
359 pMDG as previously described <sup>46</sup>.

360

361 **Monocyte isolation and differentiation**

362 PBMC were prepared from HIV seronegative donors (after informed consent was obtained),  
363 by density-gradient centrifugation (Lymphoprep, Axis-Shield, UK). Monocyte-derived  
364 macrophages (MDM) were prepared by adherence with washing of non-adherent cells after  
365 2h, with subsequent maintenance of adherent cells in RPMI 1640 medium supplemented with  
366 10% human serum and MCSF (10ng/ml) for 3 days and then differentiated for a further 4  
367 days in RPMI 1640 medium supplemented with 10% fetal calf sera without M-CSF.

368

369 **Infection of primary cells using full-length and VSV-G pseudotyped HIV-1 viruses**

370 GFP containing VSV-G pseudotyped HIV-1 was added to MDM and after 4h incubation  
371 removed and cells were washed in culture medium. The percentage of infected cells was  
372 determined 48h post-infection by Hermes WiScan automated cell-imaging system (IDEA  
373 Bio-Medical Ltd. Rehovot, Israel) and analysed using MetaMorph and ImageJ software.

374

375 **SDS-PAGE and Immunoblots**

376 Cells were lysed in reducing Laemmli SDS sample buffer containing PhosSTOP  
377 (Phosphatase Inhibitor Cocktail Tablets, Roche, Switzerland) at 96°C for 10 minutes and the  
378 proteins separated on NuPAGE® Novex® 4-12% Bis-Tris Gels. Subsequently, the proteins  
379 were transferred onto PVDF membranes (Millipore, Billerica, MA, USA), the membranes  
380 were quenched, and proteins detected using specific antibodies. Labelled protein bands were  
381 detected using Amersham ECL Prime Western Blotting Detection Reagent (GE Healthcare,  
382 USA) and Amersham Hyperfilm or AlphaInnotech CCD camera. Protein band intensities  
383 were recorded and quantified using AlphaInnotech CCD camera and AlphaView software  
384 (ProteinSimple, San Jose, California, USA).

385

386 **SAMHD1 knock-down by siRNA**

387 1x10<sup>5</sup> MDM differentiated in MCSF for 4 days were transfected with 20pmol of siRNA (L-  
388 013950-01, Dharmacon) using Lipofectamine RNAiMAX Transfection Reagent (Invitrogen).  
389 Transfection medium was replaced after 18h with RPMI 1640 medium supplemented with  
390 10% FCS and cells cultured for additional 3 days before infection.

391 **Quantitative PCR**

392 Total RNA was isolated from macrophages using the Total RNA Purification Kit from  
393 Norgen Biotek (Thorold, Canada). cDNA was synthesised using Superscript III Reverse  
394 Transcriptase (Thermo Fisher Scientific) using 500ng of template RNA. qPCR was  
395 performed on ABI 7300 machine (Thermo Fisher Scientific) using Fast SYBR green master  
396 mix (Thermo Fisher Scientific). Expression levels of target genes were normalised to  
397 glyceraldehyde-3-phosphate dehydrogenase (GAPDH) as previously described<sup>47</sup>. See primer  
398 sequences in supplementary Table1.

399 **Immunofluorescence**

400 MDMs were fixed in 3% PFA, quenched with 50 mM NH<sub>4</sub>Cl and permeabilized with 0.1%  
401 Triton X-100 in PBS or 90% Methanol. After blocking in PBS/1% FCS, MDMs were  
402 labelled for 1 hour with primary antibodies diluted in PBS/1% FCS, washed and labelled  
403 again with Alexa Fluor secondary antibodies for 1 hour. Cells were washed in PBS/1% FCS  
404 and stained with DAPI in PBS for 20 minutes. Labelled cells were detected using Hermes  
405 WiScan automated cell-imaging system (IDEA Bio-Medical Ltd. Rehovot, Israel) and  
406 analysed using MetaMorph and ImageJ software.

407

408 **Phagocytosis assay using pHrodo Bioparticles**

409 MDM were exposed to 0.25ug pHrodo (a pH-sensitive, rhodamine-based dye)-labeled *E. coli*  
410 for 1h. MDM were washed 3x in PBS and fixed. Percentage of E.coli positive cells was  
411 determined using Hermes WiScan automated cell-imaging system (IDEA Bio-Medical Ltd.  
412 Rehovot, Israel) and analysed using MetaMorph and ImageJ software.  $10^4$  cells were  
413 recorded and analysed.

414

#### 415 **ELISA**

416 Medium was collected and cytokines levels detected by ELISA (BD Biosciences)  
417 according to the manufacturer's instructions.

#### 418 **Acknowledgments:**

419 This work was funded by a Wellcome Trust Senior Fellowship in Clinical Science to RKG  
420 (WT108082AIA) and the National Institute for Health Research University College London  
421 Hospitals Biomedical Research Centre.

422

#### 423 **Ethics Statement**

424 Adult subjects provided written informed consent. Primary Macrophage & Dendritic Cell  
425 Cultures from Healthy Volunteer Blood Donors has been reviewed and granted ethical  
426 permission by the National Research Ethics Service through The Joint UCL/UCLH  
427 Committees on the Ethics of Human Research (Committee Alpha) 2nd of December 2009.  
428 Reference number 06/Q0502/92.

429

430 **Author contributions**

431 PM, RKG, LZA designed experiments; PM, RKG wrote the manuscript; PM,HW performed  
432 experiments; PM, RKG, LZA analysed data.

433

434 **Conflicts of interest**

435 The authors have no conflicts of interest

436

437 **References**

- 438 1. Iwasaki, A. & Medzhitov, R. Toll-like receptor control of the adaptive immune  
439 responses. *Nature Immunology* (2004). doi:10.1038/ni1112
- 440 2. Park, B. S. & Lee, J. O. Recognition of lipopolysaccharide pattern by TLR4  
441 complexes. *Experimental and Molecular Medicine* (2013). doi:10.1038/emm.2013.97
- 442 3. Akira, S. & Takeda, K. Toll-like receptor signalling. *Nature Reviews Immunology*  
443 (2004). doi:10.1038/nri1391
- 444 4. Geonnotti, A. R. *et al.* Differential Inhibition of Human Immunodeficiency Virus Type  
445 1 in Peripheral Blood Mononuclear Cells and TZM-bl Cells by Endotoxin-Mediated  
446 Chemokine and Gamma Interferon Production. *AIDS Res. Hum. Retroviruses* (2010).  
447 doi:10.1089/aid.2009.0186
- 448 5. Franchin, G. *et al.* Lipopolysaccharide Inhibits HIV-1 Infection of Monocyte- Derived  
449 Macrophages Through Direct and Sustained Down-Regulation of CC Chemokine  
450 Receptor 5. *J. Immunol.* (2014). doi:10.4049/jimmunol.164.5.2592
- 451 6. Kornbluth, R. S. Interferons and bacterial lipopolysaccharide protect macrophages  
452 from productive infection by human immunodeficiency virus in vitro. *J. Exp. Med.*  
453 (2004). doi:10.1084/jem.169.3.1137
- 454 7. Schlaepfer, E., Rochat, M.-A., Duo, L. & Speck, R. F. Triggering TLR2, -3, -4, -5, and  
455 -8 Reinforces the Restrictive Nature of M1- and M2-Polarized Macrophages to HIV. *J.*  
456 *Virol.* (2014). doi:10.1128/jvi.01053-14
- 457 8. Bernstein, M. S., Tong-Starksen, S. E. & Locksley, R. M. Activation of human  
458 monocyte-derived macrophages with lipopolysaccharide decreases human  
459 immunodeficiency virus replication in vitro at the level of gene expression. *J. Clin.*  
460 *Invest.* (1991). doi:10.1172/JCI115337
- 461 9. Verani, A., Sironi, F., Siccardi, A. G., Lusso, P. & Vercelli, D. Inhibition of CXCR4-  
462 Tropic HIV-1 Infection by Lipopolysaccharide: Evidence of Different Mechanisms in  
463 Macrophages and T Lymphocytes. *J. Immunol.* (2014).  
464 doi:10.4049/jimmunol.168.12.6388
- 465 10. Reinhard, C., Bottinelli, D., Kim, B. & Luban, J. Vpx rescue of HIV-1 from the  
466 antiviral state in mature dendritic cells is independent of the intracellular  
467 deoxynucleotide concentration. *Retrovirology* (2014). doi:10.1186/1742-4690-11-12
- 468 11. Verani, B. A. *et al.* C – C Chemokines Released by Lipopolysaccharide Infection in

- 469 Both Macrophages and T Cells. **185**, (1997).
- 470 12. Wang, H., Sun, J. & Goldstein, H. Human Immunodeficiency Virus Type 1 Infection  
471 Increases the In Vivo Capacity of Peripheral Monocytes To Cross the Blood-Brain  
472 Barrier into the Brain and the In Vivo Sensitivity of the Blood-Brain Barrier to  
473 Disruption by Lipopolysaccharide. *J. Virol.* (2008). doi:10.1128/JVI.00768-08
- 474 13. Mehta, H. V., Jones, P. H., Weiss, J. P. & Okeoma, C. M. IFN- and  
475 Lipopolysaccharide Upregulate APOBEC3 mRNA through Different Signaling  
476 Pathways. *J. Immunol.* (2012). doi:10.4049/jimmunol.1200777
- 477 14. Goldstone, D. C. *et al.* HIV-1 restriction factor SAMHD1 is a deoxynucleoside  
478 triphosphate triphosphohydrolase. *Nature* (2011). doi:10.1038/nature10623
- 479 15. Lahouassa, H. *et al.* SAMHD1 restricts the replication of human immunodeficiency  
480 virus type 1 by depleting the intracellular pool of deoxynucleoside triphosphates. *Nat.*  
481 *Immunol.* (2012). doi:10.1038/ni.2236
- 482 16. Cribier, A., Descours, B., Valadão, A. L. C., Laguette, N. & Benkirane, M.  
483 Phosphorylation of SAMHD1 by Cyclin A2/CDK1 Regulates Its Restriction Activity  
484 toward HIV-1. *Cell Rep.* (2013). doi:10.1016/j.celrep.2013.03.017
- 485 17. White, T. E. *et al.* The Retroviral Restriction Ability of SAMHD1, but Not Its  
486 Deoxynucleotide Triphosphohydrolase Activity, Is Regulated by Phosphorylation. *Cell*  
487 *Host Microbe* **13**, 441–451 (2013).
- 488 18. Arnold, L. H. *et al.* Phospho-dependent Regulation of SAMHD1 Oligomerisation  
489 Couples Catalysis and Restriction. *PLoS Pathog.* (2015).  
490 doi:10.1371/journal.ppat.1005194
- 491 19. Mlcochova, P. *et al.* A G1-like state allows HIV-1 to bypass SAMHD1 restriction in  
492 macrophages. *EMBO J.* (2017). doi:10.15252/embj.201696025
- 493 20. Mlcochova, P., Caswell, S. J., Taylor, I. A., Towers, G. J. & Gupta, R. K. DNA  
494 damage induced by topoisomerase inhibitors activates SAMHD1 and blocks HIV-1  
495 infection of macrophages. *EMBO J.* (2017). doi:10.15252/embj.201796880
- 496 21. Mlcochova, P., Caswell, S. J., Taylor, I. A., Towers, G. J. & Gupta, R. K. DNA  
497 damage induced by topoisomerase inhibitors activates SAMHD1 and blocks HIV-1  
498 infection of macrophages. *EMBO J.* **37**, (2018).
- 499 22. Szaniawski, M. A. *et al.* SAMHD1 Phosphorylation Coordinates the Anti-HIV-1  
500 Response by Diverse Interferons and Tyrosine Kinase Inhibition. *MBio* (2018).  
501 doi:10.1128/mbio.00819-18
- 502 23. Ajayi, S. *et al.* Ruxolitinib. in *Recent Results in Cancer Research* (2018).  
503 doi:10.1007/978-3-319-91439-8\_6
- 504 24. Clark, K., Plater, L., Peggie, M. & Cohen, P. Use of the pharmacological inhibitor  
505 BX795 to study the regulation and physiological roles of TBK1 and IκB Kinase ε: A  
506 distinct upstream kinase mediates ser-172 phosphorylation and activation. *J. Biol.*  
507 *Chem.* (2009). doi:10.1074/jbc.M109.000414
- 508 25. Midwood, K. S., Chiquet, M., Tucker, R. P. & Orend, G. Tenascin-C at a glance. *J.*  
509 *Cell Sci.* (2016). doi:10.1242/jcs.190546
- 510 26. Midwood, K. *et al.* Tenascin-C is an endogenous activator of Toll-like receptor 4 that  
511 is essential for maintaining inflammation in arthritic joint disease. *Nat. Med.* (2009).  
512 doi:10.1038/nm.1987
- 513 27. Xaus, J. *et al.* Interferon  $\gamma$  induces the expression of p21(waf-1) and arrests  
514 macrophage cell cycle, preventing induction of apoptosis. *Immunity* (1999).  
515 doi:10.1016/S1074-7613(00)80085-0
- 516 28. Dey, A. *et al.* Colony-stimulating Factor-1 Receptor Utilizes Multiple Signaling  
517 Pathways to Induce Cyclin D2 Expression. *Mol. Biol. Cell* (2013).  
518 doi:10.1091/mbc.11.11.3835

- 519 29. Zhang, C., Cui, G., Chen, Y. & Fan, K. Antitumor effect of interferon- $\gamma$  on U937 human  
520 acute leukemia cells in vitro and its molecular mechanism. *J. Huazhong Univ. Sci.*  
521 *Technol. - Med. Sci.* (2007). doi:10.1007/s11596-007-0509-z
- 522 30. Munn, D. H., Pressey, J., Beall, A. C., Hudes, R. & Alderson, M. R. Selective  
523 activation-induced apoptosis of peripheral T cells imposed by macrophages. A  
524 potential mechanism of antigen-specific peripheral lymphocyte deletion. *J Immunol*  
525 (1996).
- 526 31. Vairo, G., Royston, A. K. & Hamilton, J. A. Biochemical events accompanying  
527 macrophage activation and the inhibition of colony-stimulating factor-1-induced  
528 macrophage proliferation by tumor necrosis factor- $\alpha$ , interferon- $\gamma$ , and  
529 lipopolysaccharide. *J. Cell. Physiol.* (1992). doi:10.1002/jcp.1041510324
- 530 32. Zhang, K. *et al.* MicroRNA-322 inhibits inflammatory cytokine expression and  
531 promotes cell proliferation in LPS-stimulated murine macrophages by targeting NF-  
532  $\kappa$ B1 (p50). *Biosci. Rep.* (2016). doi:10.1042/bsr20160239
- 533 33. Thongngarm, T., Jenkins, J. K., Ndebele, K. & McMurray, R. W. Estrogen and  
534 progesterone modulate monocyte cell cycle progression and apoptosis. *Am. J. Reprod.*  
535 *Immunol.* (2003). doi:10.1034/j.1600-0897.2003.00015.x
- 536 34. Mytych, J., Romerowicz-Misielak, M. & Kozirowski, M. Long-term culture with  
537 lipopolysaccharide induces dose-dependent cytostatic and cytotoxic effects in THP-1  
538 monocytes. *Toxicol. Vitro.* (2017). doi:10.1016/j.tiv.2017.03.009
- 539 35. Sagar, S., Kumar, P., Behera, R. R. & Pal, A. Effects of CEES and LPS synergistically  
540 stimulate oxidative stress inactivates OGG1 signaling in macrophage cells. *J. Hazard.*  
541 *Mater.* (2014). doi:10.1016/j.jhazmat.2014.05.096
- 542 36. Lee, S. H. *et al.* ERK activation drives intestinal tumorigenesis in Apc min/+ mice.  
543 *Nat. Med.* (2010). doi:10.1038/nm.2143
- 544 37. Kawai, T. *et al.* Lipopolysaccharide stimulates the MyD88-independent pathway and  
545 results in activation of IFN-regulatory factor 3 and the expression of a subset of  
546 lipopolysaccharide-inducible genes. *J. Immunol.* (2001).
- 547 38. Perkins, D. J., Qureshi, N. & Vogel, S. N. A Toll-Like Receptor-Responsive Kinase,  
548 Protein Kinase R, Is Inactivated in Endotoxin Tolerance through Differential K63/K48  
549 Ubiquitination. *MBio* (2010). doi:10.1128/mbio.00239-10
- 550 39. Evan, G. I. & Vousden, K. H. Proliferation, cell cycle and apoptosis in cancer. *Nature*  
551 (2001). doi:10.1038/35077213
- 552 40. Neil, S. & Bieniasz, P. Human immunodeficiency virus, restriction factors, and  
553 interferon. *J. Interferon Cytokine Res.* **29**, 569–80 (2009).
- 554 41. Gomez Perdiguero, E., Schulz, C. & Geissmann, F. Development and homeostasis of  
555 ‘resident’ myeloid cells: The case of the microglia. *Glia* (2013).  
556 doi:10.1002/glia.22393
- 557 42. Cingöz, O. & Goff, S. P. Cyclin-dependent kinase activity is required for type I  
558 interferon production. *Proc. Natl. Acad. Sci.* (2018). doi:10.1073/pnas.1720431115
- 559 43. Scatizzi, J. C. *et al.* The CDK domain of p21 is a suppressor of IL-1 $\beta$ -mediated  
560 inflammation in activated macrophages. *Eur. J. Immunol.* (2009).  
561 doi:10.1002/eji.200838683
- 562 44. Murakami, Y., Mizoguchi, F., Saito, T., Miyasaka, N. & Kohsaka, H. p16INK4a  
563 Exerts an Anti-Inflammatory Effect through Accelerated IRAK1 Degradation in  
564 Macrophages. *J. Immunol.* (2012). doi:10.4049/jimmunol.1103156
- 565 45. Gui, P. *et al.* Rho/ROCK pathway inhibition by the CDK inhibitor p27kip1  
566 participates in the onset of macrophage 3D-mesenchymal migration. *J. Cell Sci.*  
567 (2014). doi:10.1242/jcs.150987
- 568 46. Besnier, C., Takeuchi, Y. & Towers, G. Restriction of lentivirus in monkeys. *Proc.*

- 569 *Natl. Acad. Sci.* (2002). doi:10.1073/pnas.172384599  
570 47. Tsang, J. *et al.* HIV-1 infection of macrophages is dependent on evasion of innate  
571 immune cellular activation. *AIDS* (2009). doi:10.1097/QAD.0b013e328331a4ce  
572  
573  
574  
  
575  
576  
  
577  
578  
579



580 **FIGURES LEGENDS**

581 **FIGURE 1:**

582 **TLR4 activation dephosphorylates SAMHD1 and blocks HIV-1 infection**

583 **A.** MDM were treated by LPS for 18h and infected by VSV-G pseudotyped HIV-  
584 1. % infected cells were determined 48h post-infection. ( $n = 6$ , mean  $\pm$  s.e.m.;  
585 \*\*\* $P$ -value $\leq 0.001$ , paired  $t$ -test). Cells from a representative donor were used  
586 for immunoblotting.

587 **B.** MDM were treated with increasing concentration of LPS 18h before infection.  
588 Cells were infected by VSV-G pseudotyped HIV-1 and % infected cells were  
589 determined 48h post-infection. ( $n = 3$ , mean  $\pm$  s.e.m.; \*\*\* $P$ -value $\leq 0.001$ ,  
590 paired  $t$ -test). Cells from a representative donor were used for immunoblotting.

591 **C.** A simplified diagram of macrophage activation mediated by TLR4 signalling  
592 in response to LPS. LPS activates both MyD88-dependent and independent  
593 signalling pathways. TAK242, an inhibitor of TLR4 signalling; BX795, an  
594 inhibitor of TBK1, suppresses IFN signalling; RUXO, ruxolitinib, inhibitor of  
595 JAK1/2 kinase, suppresses IFN signalling.

596 **D, F, H.** MDM were treated with inhibitors for 6h (D) TLR4 inhibitor TAK242, (F)  
597 JAK1/2 inhibitor RUXO, or 2h (H) TBK1 inhibitor BX795 before addition of  
598 LPS. Cells were infected by VSV-G pseudotyped HIV-1 18h later. % infected  
599 cells were determined 48h post-infection. ( $n = 3$ , mean  $\pm$  s.e.m.; \*\*\* $P$ -  
600 value $\leq 0.001$ , \*\* $P$ -value  $\leq 0.01$ , paired  $t$ -test). Cells from a representative donor  
601 were used for immunoblotting.

602 **E,G,I.** IRF3/NF $\kappa$ B translocation assay. Cells were exposed to LPS in the absence or  
603 presence of (E) TAK242, (G) RUXO (I) BX795 and 2h later stained for

604 IRF3/NFkB. % of cells with nuclear staining were determined. ( $n = 3$ ,  
605 mean  $\pm$  s.e.m.; \*\* $P$ -value  $\leq 0.01$ , paired  $t$ -test).

606

607 FIGURE 2:

608 **TLR4 activation of SAMHD1 is MyD88-independent**

609 A. Diagram of TLR4 activation. LPS activates both MyD88-dependent and  
610 independent signalling pathways. Tenascin-C (TNC) activates only MyD88-  
611 dependent pathway leading to NFkB translocation to nucleus.

612 B. IRF3/NFkB translocation assay. Cells were exposed to TNC and LPS and 2h later  
613 stained for IRF3/NFkB. % of cells with nuclear staining were determined. ( $n = 3$ ,  
614 mean  $\pm$  s.e.m.; \*\*\* $P$ -value  $\leq 0.001$ , \*\* $P$ -value  $\leq 0.01$ , (ns) non-significant, paired  
615  $t$ -test).

616 C. MDM were treated with LPS and TNC and cytokines were measured by ELISA in  
617 culture media 24h later.

618 D. MDM were treated with TNC and LPS. Cells were infected by VSV-G  
619 pseudotyped HIV-1 18h later. % infected cells were determined 48h post-infection.  
620 ( $n = 3$ , mean  $\pm$  s.e.m.; \*\* $P$ -value  $\leq 0.01$ , paired  $t$ -test). Cells from a representative  
621 donor were used for immunoblotting.

622

623 FIGURE 3:

624 **TLR 4 activation induces G0 arrest in human MDM.**

625 A. MDM were treated with TAK242, RUXO, and BX795 6h before addition of LPS.  
626 Cell lysates were prepared 18h later to detect changes to cells cycle and SAMHD1  
627 phosphorylation. MCM2, a marker of cell cycle is expressed during cell cycle  
628 phases and completely absent in G0/quiescent state.

- 629 B. MDM were treated with TAK242, RUXO, and BX795 6h before addition of LPS.  
630 Cells were infected by VSV-G pseudotyped HIV-1 18h later. % infected cells  
631 were determined 48h post-infection. ( $n = 3$ , mean  $\pm$  s.e.m.; \*\*\* $P$ -value $\leq 0.001$ ,  
632 paired  $t$ -test).
- 633 C. MDM were treated with TNC and LPS. Cell lysates were prepared 18h later to  
634 detect changes to cells cycle and SAMHD1 phosphorylation. MCM2, a marker of  
635 cell cycle is expressed during cell cycle phases and completely absent in  
636 G0/quiescent state.
- 637 D. MDM were treated by LPS and cell lysates were prepared 18h later to detect  
638 changes in cell cycle associated proteins.
- 639 E. A heat map presents differential gene expression patterns of cell cycle associated  
640 transcripts in MDM from 5 different donors treated with LPS for 18h. The colour  
641 scale bar corresponds to log-fold expression.
- 642 F. Relative expression levels (fold change) of cell cycle associated transcripts.  
643 ( $n = 6$ , mean  $\pm$  s.e.m.; \*\*\* $P$ -value $\leq 0.001$ , \*\* $P$ -value  $\leq 0.01$ , \* $P$ -value  $\leq 0.1$ ,  
644 paired  $t$ -test).

645

646

647 **FIGURE 4:**

648 **LPS mediated cell cycle regulation in human MDM is both interferon-dependent**  
649 **and independent.**

- 650 A. A heat map presents differential gene expression patterns of cell cycle associated  
651 transcripts in MDM treated with LPS or IFN $\beta$  in the presence or absence of  
652 RUXO. The colour scale bar corresponds to log-fold expression.

- 653 B. Relative expression levels (fold changes) of statistically significantly changed cell  
654 cycle associated transcripts after LPS or IFN $\beta$  treatment in the presence or  
655 absence of RUXO. ( $n = 4$ , mean  $\pm$  s.e.m.; \*\*\* $P$ -value $\leq 0.001$ , \*\* $P$ -value  $\leq 0.01$ ,  
656 \* $P$ -value  $\leq 0.1$ , (ns) non-significant, paired  $t$ -test).
- 657 C. MDM were treated with TAK242 and RUXO 6h before addition of LPS and  
658 interferon b (IFN $\beta$ ). Cells were infected by VSV-G pseudotyped HIV-1 18h later.  
659 % infected cells were determined 48h post-infection. ( $n = 3$ , mean  $\pm$  s.e.m.; \*\*\* $P$ -  
660 value $\leq 0.001$ , \*\* $P$ -value  $\leq 0.01$ , paired  $t$ -test). Cells from a representative donor  
661 were used for immunoblotting.
- 662 D. MDM were exposed to anti-IFN Ab/IgG2b non-specific Ab and treated with LPS.  
663 Cells were infected by VSV-G pseudotyped HIV-1 18h later. % infected cells  
664 were determined 48h post-infection. ( $n = 3$ , mean  $\pm$  s.e.m.; \*\*\* $P$ -value  $\leq 0.01$ ,  
665 paired  $t$ -test).

666

667

668 FIGURE 5:

669 **SAMHD1 depletion rescues HIV-1 infection after TLR4 activation.**

- 670 A. MDM were transfected with control or pool of SAMHD1 siRNAs and 3 days later  
671 treated with LPS and infected in the presence of LPS with VSV-G-pseudotyped  
672 HIV-1 GFP 18h later. The percentage of infected cells was quantified 48h post-  
673 infection. Error bars represent technical triplicates.
- 674 B. MDM were transfected with control or pool of SAMHD1 siRNAs and 3 days later  
675 treated with RUXO and 6h later with LPS. Cells were infected in the presence of  
676 LPS with VSV-G-pseudotyped HIV-1 GFP 18h later. The percentage of infected

677 cells was quantified 48h post-infection. ( $n = 4$ , mean  $\pm$  s.e.m.; \*\*\*P-value $\leq 0.001$ ,  
678 paired *t*-test).

679 C. Cells from a representative donor were used for immunoblotting.

680

681 FIGURE 6:

682 **TLR4 activation by gram negative bacteria arrests cell cycle in human MDM and**  
683 **blocks HIV-1 infection.**

684 A. pHrodo (a pH-sensitive, rhodamine-based dye)-labeled *E. coli* were added to  
685 MDM for 1h. MDM were washed 3x in PBS and fixed.  $10^4$  cells were recorded  
686 and analysed. Percentage of E.coli positive cells was determined using automated  
687 cell-imaging system Hermes WiScan and ImageJ.

688 B. MDM were treated with pHrodo E.coli or LPS in the presence or absence of  
689 RUXO and cytokines were measured in culture media 24h later.

690 C. IRF3/NF $\kappa$ B translocation assay. Cells were exposed to pHrodo E.coli in the  
691 presence or absence of inhibitors and 2h later stained for IRF3/NF $\kappa$ B. % of cells  
692 with nuclear staining was determined. ( $n = 3$ , mean  $\pm$  s.e.m.; \*\*\*P-value $\leq 0.001$ ,  
693 paired *t*-test).

694 D. MDM were treated with TAK242 or RUXO 6h before addition of pHrodo E.coli.  
695 Cells were infected by VSV-G pseudotyped HIV-1 18h later. % infected cells  
696 were determined 48h post-infection. Cells from a representative donor were used  
697 for immunoblotting. ( $n = 3$ , mean  $\pm$  s.e.m.; \*\*\*P-value $\leq 0.001$ , \*\*P-value  $\leq 0.01$ ,  
698 paired *t*-test).

699 E. MDM were treated with BX795 2h before addition of pHrodo E.coli. Cells were  
700 infected by VSV-G pseudotyped HIV-1 18h later. % infected cells were

701 determined 48h post-infection. Cells from a representative donor were used for  
702 immunoblotting. ( $n = 3$ , mean  $\pm$  s.e.m.; \*\*\* $P$ -value $\leq 0.001$ , paired  $t$ -test).

703 F. Relative expression levels (fold changes) of cell cycle associated transcripts.  
704 MDM were treated with RUXO 6h before addition of pHrodo E.coli. Cells were  
705 collected 24h later. ( $n = 3$ , mean  $\pm$  s.e.m.; \*\*\* $P$ -value $\leq 0.001$ , \*\* $P$ -value  $\leq 0.01$ ,  
706 \* $P$ -value  $\leq 0.1$ , paired  $t$ -test).

707

708

709

## 710 SUPPLEMENTARY FIGURES

### 711 Figure S1

712 A. MDM were treated with increasing concentration of LPS 18h before infection.  
713 Cells were infected by VSV-G pseudotyped HIV-1 and % infected cells were  
714 determined 48h post-infection. ( $n = 3$ , mean  $\pm$  s.e.m.; \*\*\* $P$ -value $\leq 0.001$ , paired  
715  $t$ -test).

716 B. Cells from a representative donor were used for immunoblotting.

717

### 718 Figure S2

719 A. Simplified diagram of site of function of iNOS and ROS inhibitors.

720 B. MDM were treated with increasing concentration of iNOS inhibitor 1400W 6h before  
721 LPS addition. LPS was added to cells 18h before infection. Cells were infected by  
722 VSV-G pseudotyped HIV-1 and % infected cells were determined 48h post-infection.

723 C. Cells from a representative donor were used for immunoblotting.

724 D. MDM were treated with LPS in the presence or absence of ROS inhibitor NAC and  
725 labelled with CellROX to detect ROS.

726 E. MDM were treated with LPS in the presence or absence of ROS inhibitor NAC 18h  
727 before infection. Cells were infected by VSV-G pseudotyped HIV-1 and % infected  
728 cells were determined 48h post-infection. ( $n = 3$ , mean  $\pm$  s.e.m.).

729

730 **Figure S3**

731 A. MDM were treated with LPS for 2 or 24h, or with Etoposide for 2h (positive  
732 control for DNA damage). Cells were fixed and stained for DNA damage foci  
733 positive for gH2AX and 53BP1.

734 B. Quantification of gH2AX positive cells. 1,000 cells were analysed using Hermes  
735 WiScan automated cell-imaging system (IDEA Bio-Medical Ltd. Rehovot, Israel)  
736 and analysed using MetaMorph and ImageJ software.

737 C. Quantification of 53BP1 positive cells. 1,000 cells were analysed using Hermes  
738 WiScan automated cell-imaging system (IDEA Bio-Medical Ltd. Rehovot, Israel)  
739 and analysed using MetaMorph and ImageJ software.

740 D. MDM treated or untreated with LPS were stained for nuclei using DAPI stain.  
741 Cell numbers were quantified using Hermes WiScan automated cell-imaging  
742 system (IDEA Bio-Medical Ltd. Rehovot, Israel) and analysed using MetaMorph  
743 and ImageJ software. ( $n = 7$ , mean  $\pm$  s.e.m.; (ns) non-significant, paired  $t$ -test).

744

745 **SUPPLEMENTARY TABLE 1**

746 Sequences of primers used for this study.

747

748

749

750

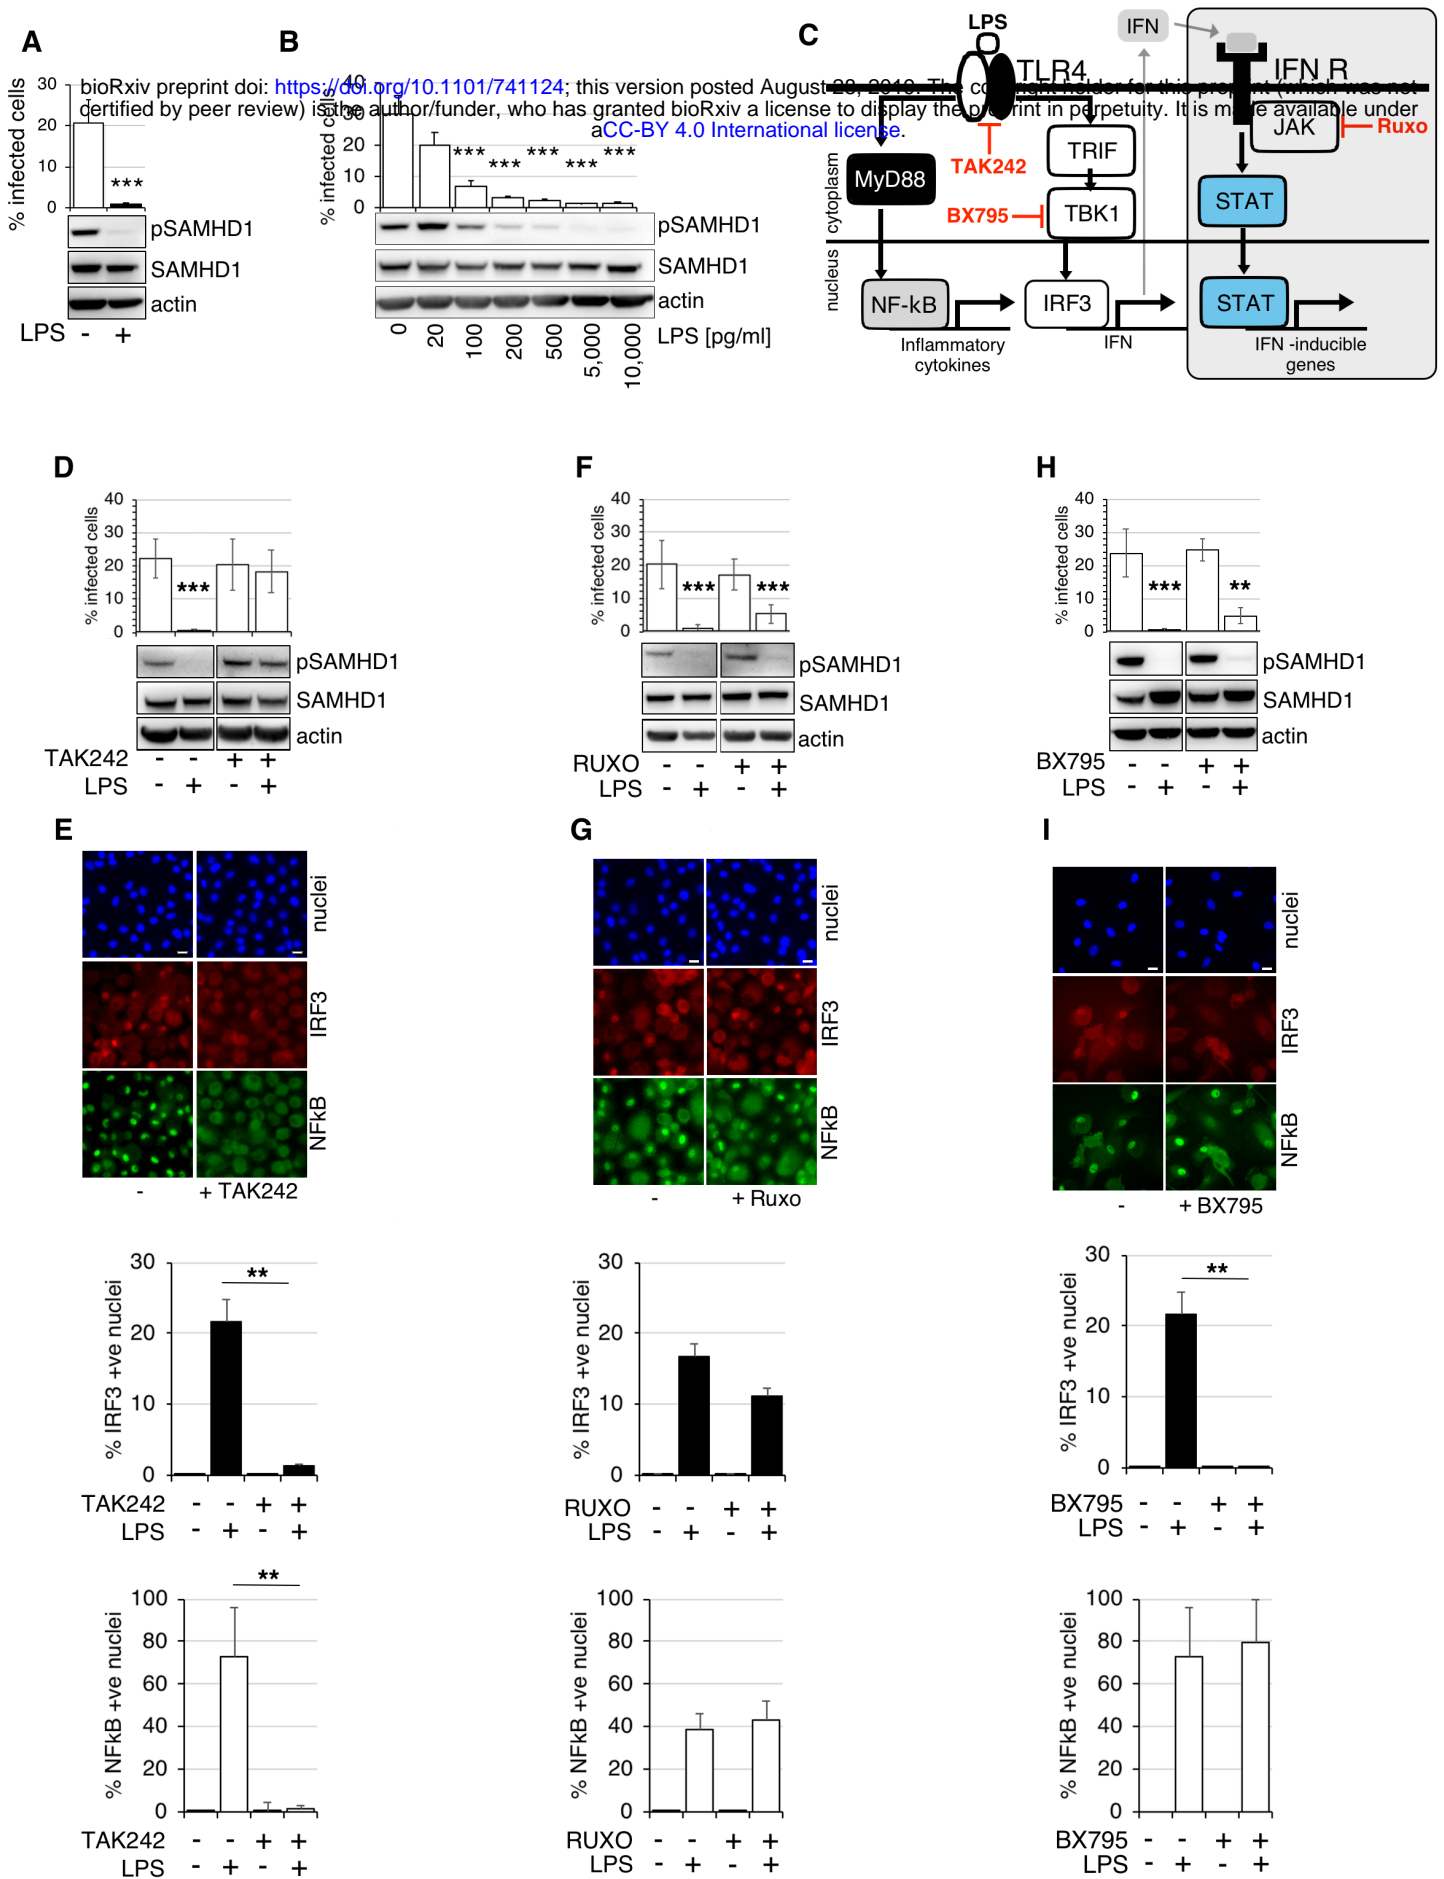

FIGURE1  
Mlcochova et.al.



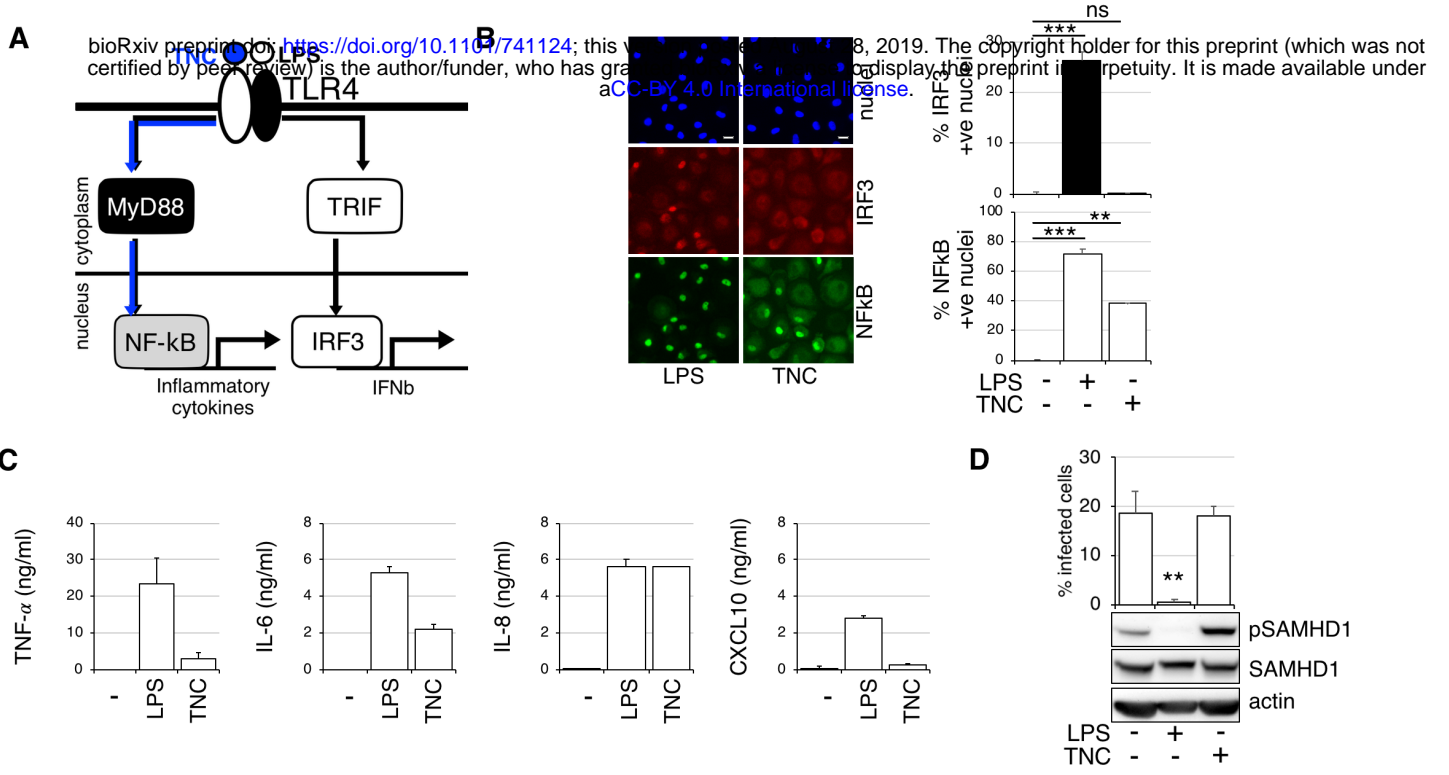

FIGURE 2  
Mlcochova et.al.

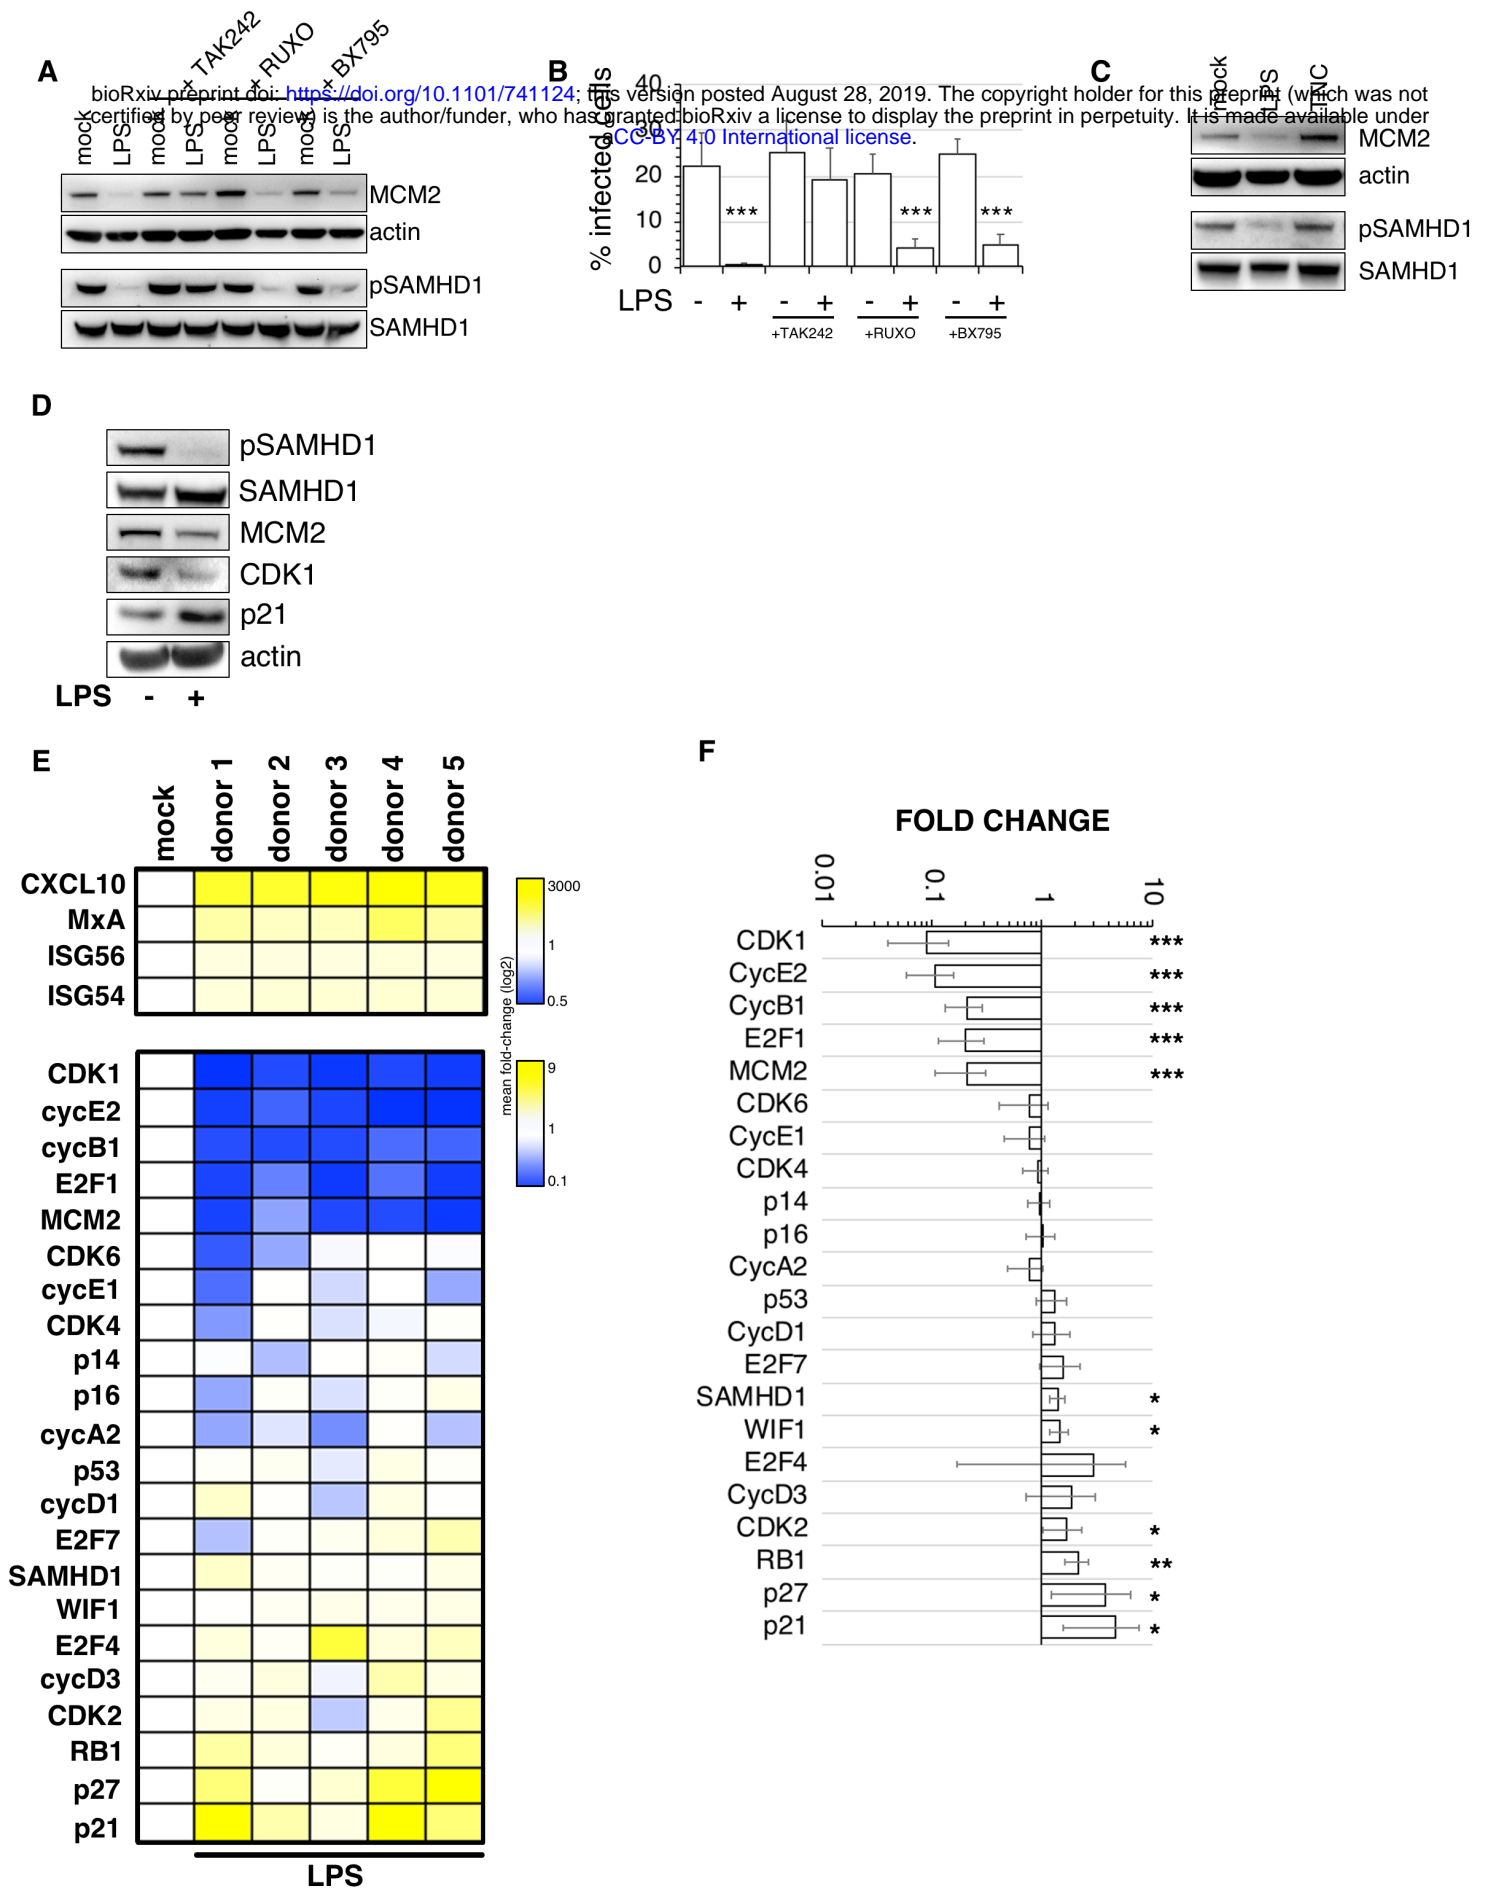

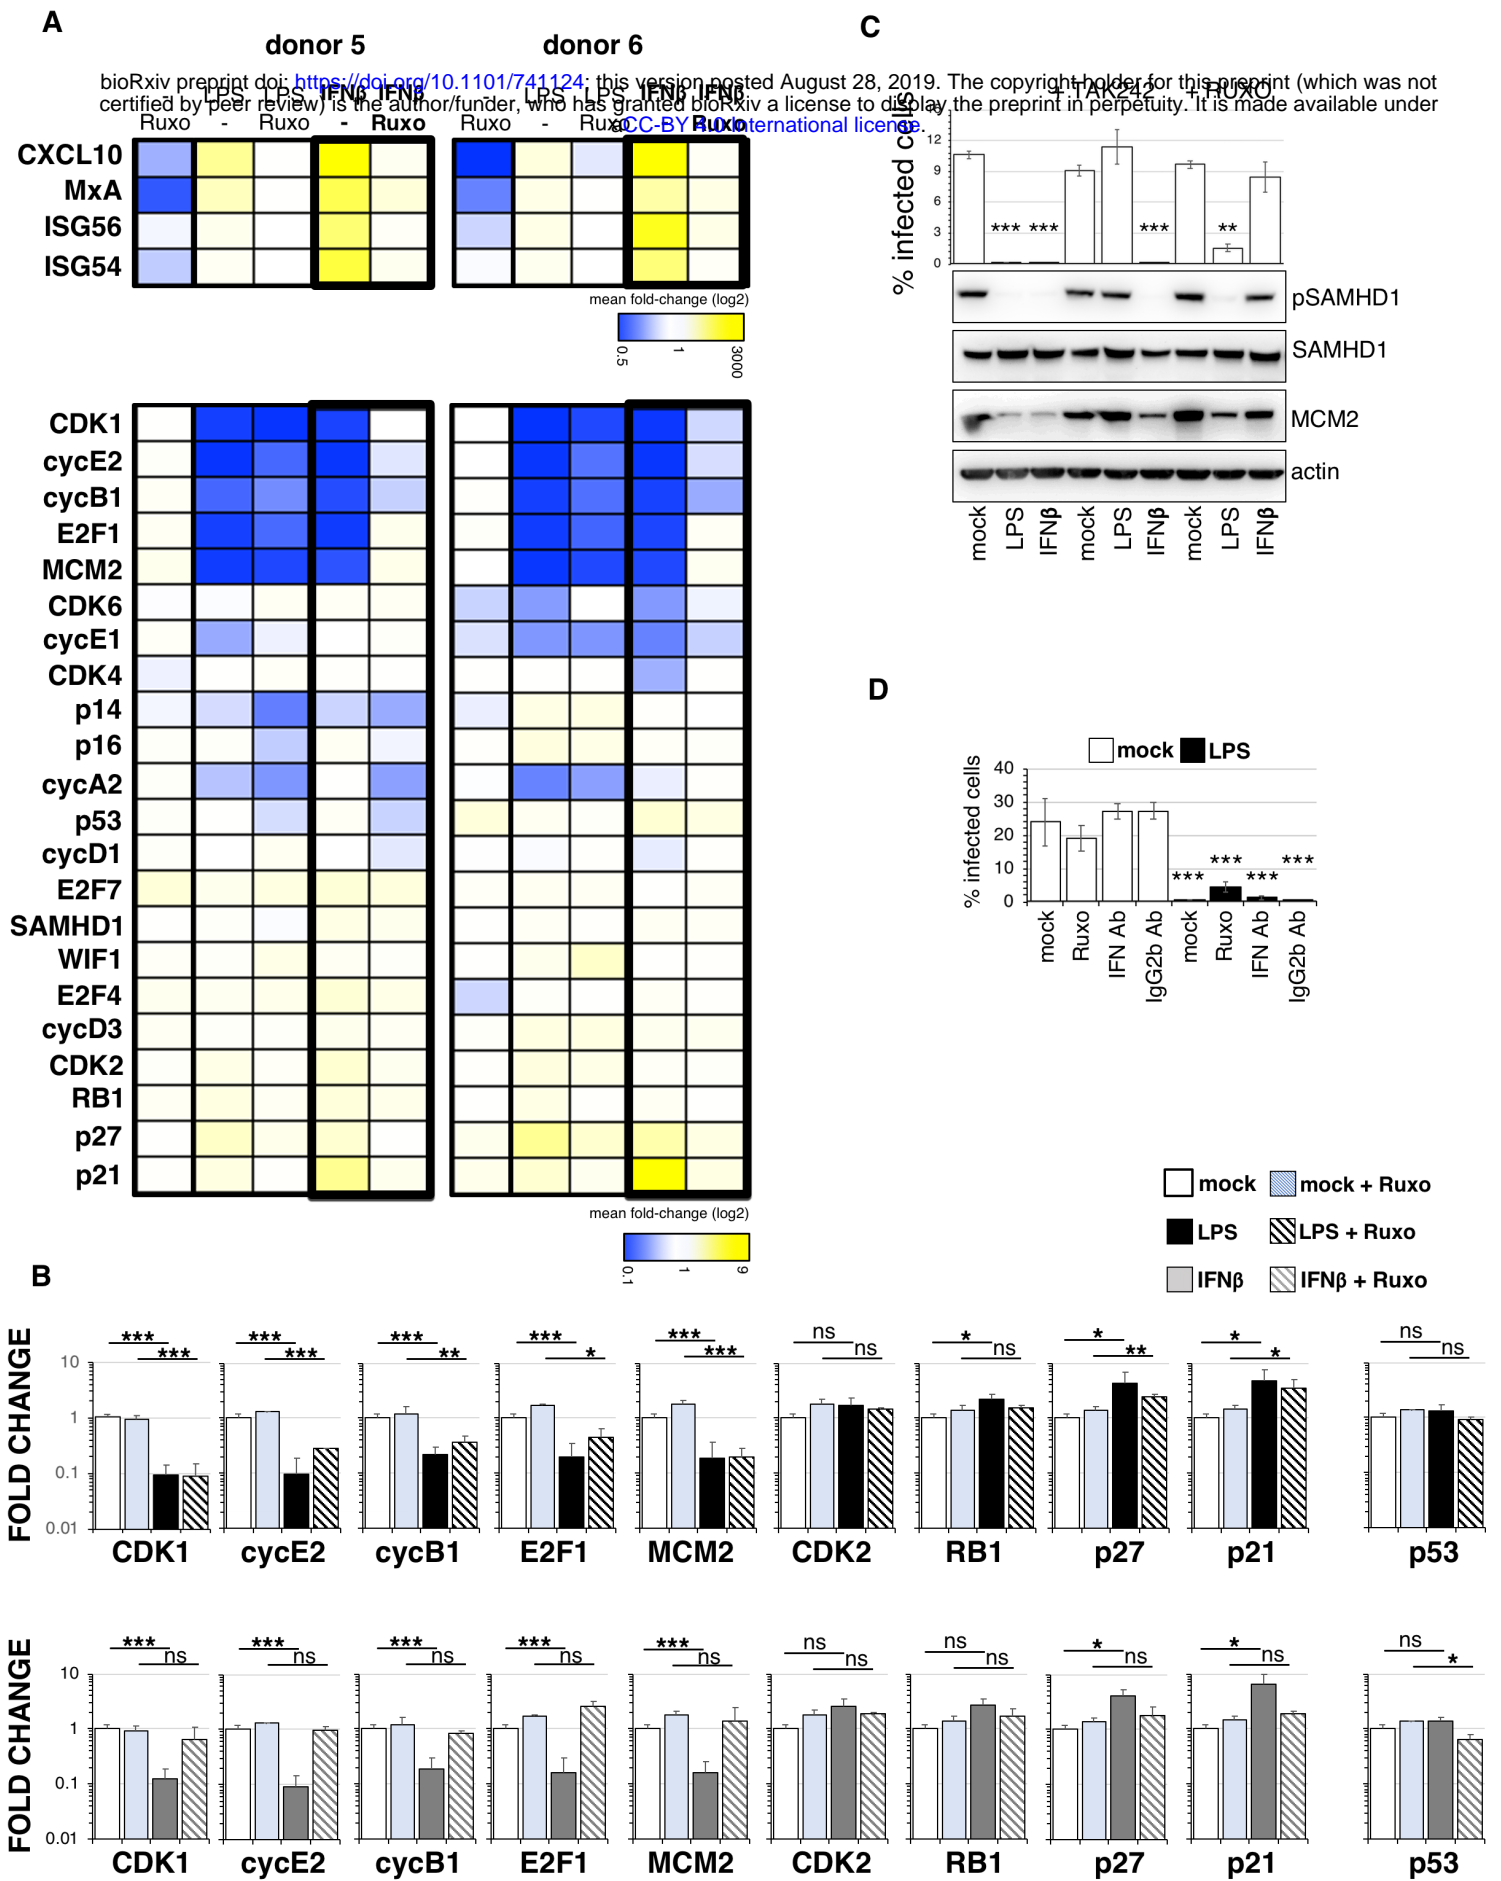

FIGURE 4  
 Mlcochova et.al.

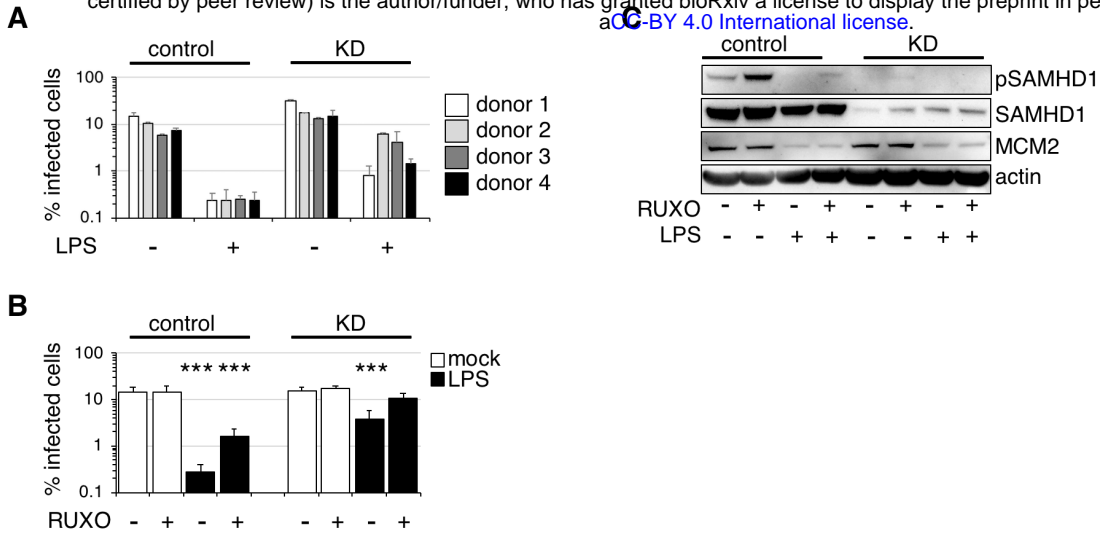

FIGURE 5  
Mlcochova et.al.

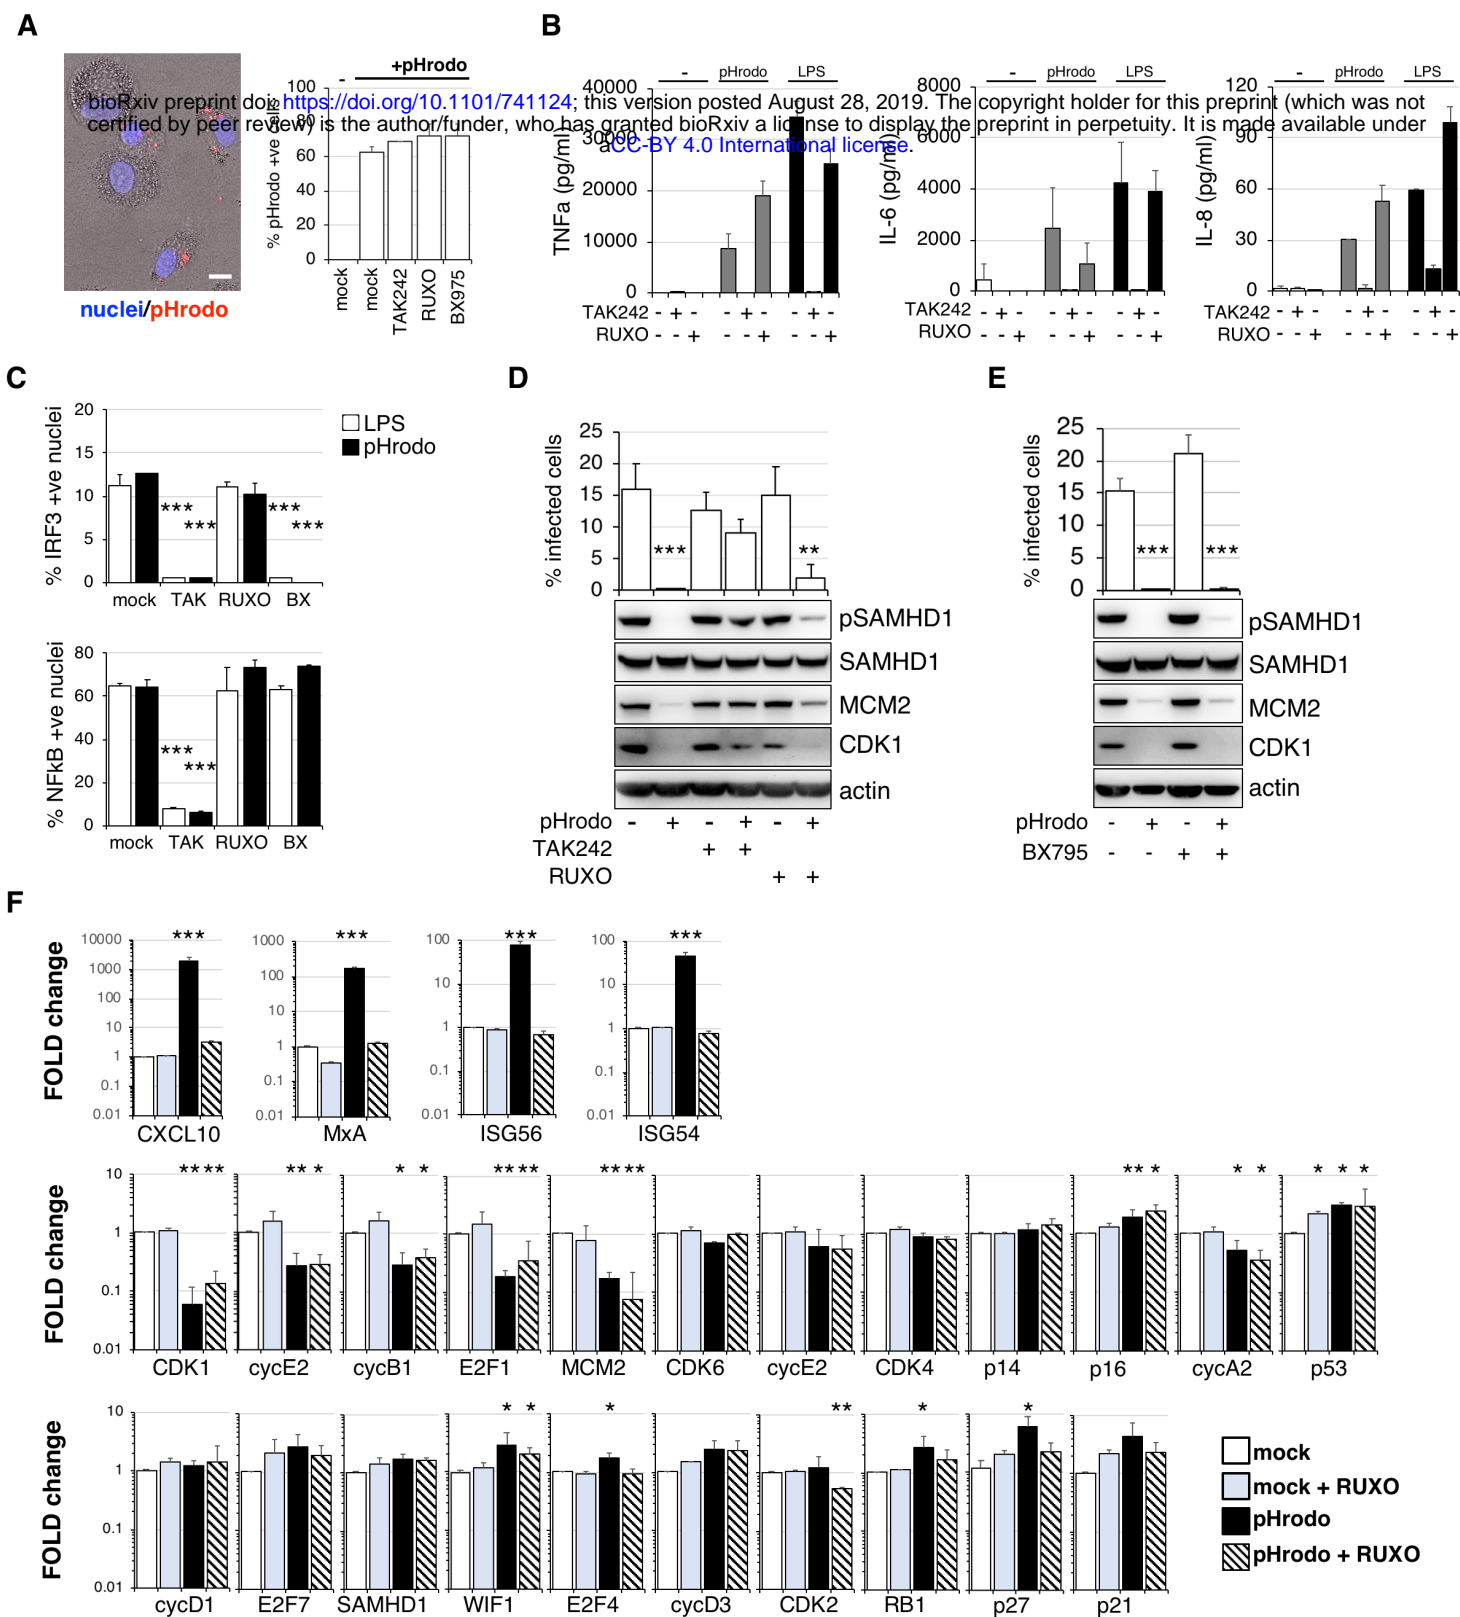

**A**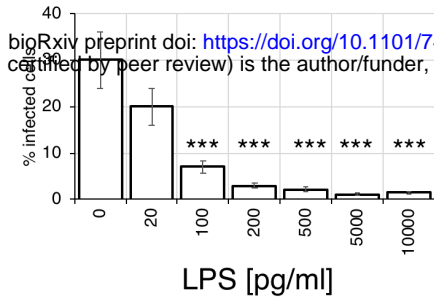**B**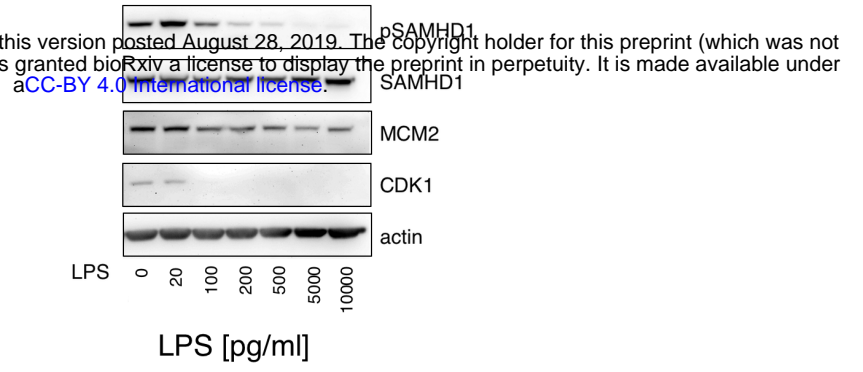

FIGURE S1  
Mlcochova et.al.

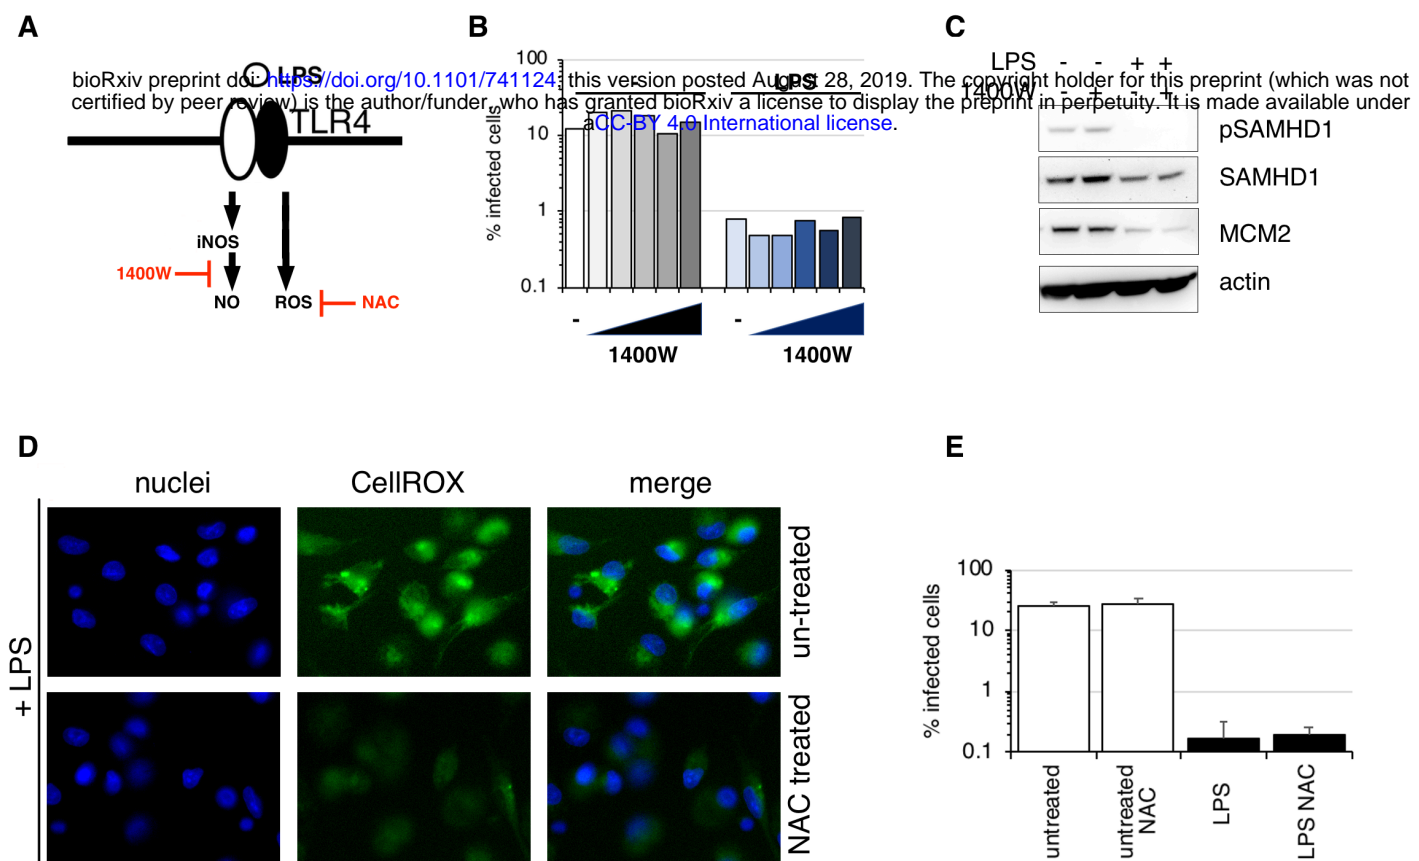

FIGURE S2  
Mlcochova et.al.

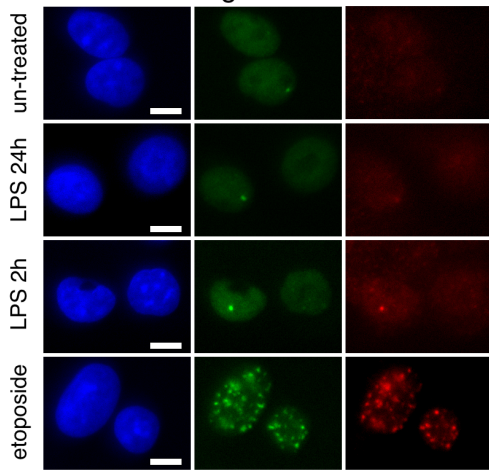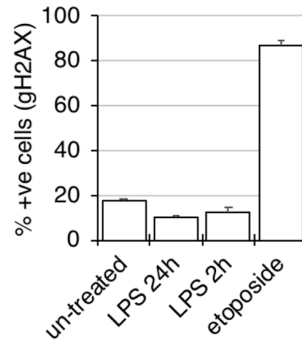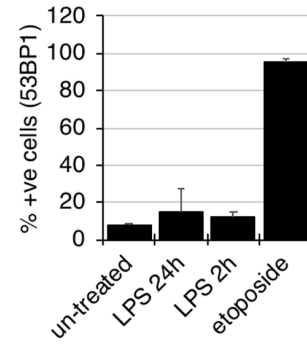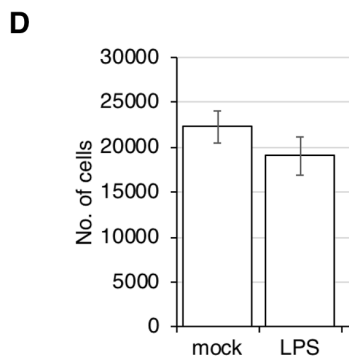

FIGURE S3  
Mlcochova et.al.



Supplementary Table 1.

|              |     | <b>Sequence (5'→3')</b>  |
|--------------|-----|--------------------------|
| CDK1         | FWD | TGAGGAACGGGGTCCTCTAA     |
|              | REV | ATGGCTACCACTTGACCTGT     |
| CDK2         | FWD | AAGTTGACGGGAGAGGTGGT     |
|              | REV | TGATGAGGGGAAGAGGAATG     |
| CDK4         | FWD | CAGATGGCACTTACACCCGT     |
|              | REV | CAGCCCAATCAGGTCAAAGA     |
| CDK6         | FWD | CGTGGTCAGGTTGTTTGATGT    |
|              | REV | CGGTGTGAATGAAGAAAGTCC    |
| Cyclin A2    | FWD | AAGACGAGACGGGTTGC        |
|              | REV | GGCTGTTTACTGTTTGCTTTCC   |
| Cyclin B1    | FWD | TTCTGGATAATGGTGAATGGAC   |
|              | REV | ATGTGGCATACTTGTTCTTGAC   |
| Cyclin D1    | FWD | AGATGAAGGAGACCATCCCCC    |
|              | REV | CCACTTGAGCTTGTTACCA      |
| Cyclin D3    | FWD | GGCCGGGGACCGAAACT        |
|              | REV | CAGTGGCGAAGTGTTTACAAAGT  |
| Cyclin E1    | FWD | CCGGTATATGGCGACACAAG     |
|              | REV | TACGCAAACCTGGTGCAACTT    |
| Cyclin E2    | FWD | TCTCCTGGCTAAATCTCTTTCTCC |
|              | REV | ACTGTCCCCTCCAAACCTG      |
| E2F1         | FWD | TGCCAAGAAGTCCAAGAACCA    |
|              | REV | GTCAACCCCTCAAGCCGTC      |
| E2F4         | FWD | CGGACCCAACCTTCTACCT      |
|              | REV | GGGGCAAACACTTCTGAGGA     |
| E2F7         | FWD | CCTTTAGCCCACCCAGTATTT    |
|              | REV | ATCCCTCTCTGACCCTGACC     |
| MCM2         | FWD | CACCCGAAGCTCAACCAGAT     |
|              | REV | ATCATGGACTCGATGTGCCG     |
| RB1          | FWD | AAAGGACCGAGAAGGACCA      |
|              | REV | AAGGCTGAGGTTGCTTGTGT     |
| WIF1         | FWD | TCTGTTCAAAGCCTGTCTGC     |
|              | REV | ACATTGGCATTGTTGGGTT      |
| CDKN2A (p14) | FWD | GAGTGAGGGTTTTCGTGGTTC    |
|              | REV | ACGGGTCCGGTGAGAGTG       |
| CDKN2A (p16) | FWD | CGGCTGACTGGCTGGC         |
|              | REV | GGGTCCGGTGAGAGTGG        |
| p21          | FWD | GCCGAAGTCAGTTCCTTGTG     |
|              | REV | TCGAAGTTCCATCGCTCACG     |
| p27          | FWD | ATGTTTCAGACGGTTCCCCA     |
|              | REV | TCCAACGCTTTTAGAGGCAG     |

|             |     |                            |
|-------------|-----|----------------------------|
| p53         | FWD | AAGTCTAGAGCCACCGTCCA       |
|             | REV | TTTCAGGAAGTAGTTTCCATAGGT   |
| CXCL10      | FWD | TGGCATTCAAGGAGTACCTC       |
|             | REV | TTGTAGCAATGATCTCAACACG     |
| IFIT1/ISG56 | FWD | CCT CCT TGG GTT CGT CTA CA |
|             | REV | GGC TGA TAT CTG GGT GCC TA |
| IFIT2/ISG54 | FWD | CAGCTGAGAATTGCACTGCAA      |
|             | REV | CGTAGGCTGCTCTCCAAGGA       |
| MxA         | FWD | ATC CTG GGA TTT TGG GGC TT |
|             | REV | CCG CTT GTC GCT GGT GTC G  |
| SAMHD1      | FWD | TTGTGCTAGAGATAAGGAAGTTGG   |
|             | REV | TGTGTTGATAAGCTCTACGGTG     |
| GAPDH       | FWD | ACC CAG AAG ACT GTG GAT GG |
|             | REV | TTC TAG ACG GCA GGT CAG GT |
